21 **Abstract**

22 Human mesenchymal stem cells (hMSCs) can be differentiated into adipocytes and osteoblasts. While the  
23 transcriptomic and epigenomic changes during adipogenesis and osteogenesis have been characterized,  
24 what happens to the chromatin loops is hardly known. Here we induced hMSCs to adipogenic and  
25 osteogenic differentiation, and performed 2 kb resolution Hi-C experiments for loop detection and  
26 generated RNA-seq, histone modification ChIP-seq and ATAC-seq data for integrative analysis before  
27 and after differentiation. We quantitatively identified differential contact loops and unique loops. After  
28 integrating with multi-omics data, we demonstrate that strengthened loops after differentiation are  
29 associated with gene expression activation. Specially, unique loops are linked with cell fate determination.  
30 We also proposed loop-mediated regulatory networks and identified *IRS2* and *RUNX2* as being activated  
31 by cell-specific loops to facilitate adipocytes and osteoblasts commitment, respectively. These results are  
32 expected to help better understand the long-range regulation in controlling hMSC differentiation, and  
33 provide novel targets for studying adipocytes and osteoblasts determination.

## 34 **Introduction**

35 Human mesenchymal stem cells (hMSCs) are multipotential cells and capable of differentiating into a  
36 number of common lineages, including adipocytes and osteoblasts. Previous studies have characterized  
37 many key factors that manipulate hMSC differentiation. For example, the transcriptome profiling  
38 throughout the lineage commitment of MSC cell line into adipocytes<sup>1, 2</sup> and osteoblasts<sup>3, 4</sup> has already  
39 been reported, and a bunch of signature genes have been identified in these processes<sup>5</sup>. In particular, the  
40 investigation of core transcription factors (TFs) during hMSC differentiation has also made marked  
41 success, and uncovered several master regulators, like peroxisome proliferator-activated receptor  $\gamma$   
42 (PPAR $\gamma$ )<sup>6, 7, 8</sup>, CCAAT-enhancer-binding proteins  $\alpha$  (C/EBP $\alpha$ )<sup>9, 10</sup> for adipogenesis, and runt-related  
43 transcription factor 2 (RUNX2)<sup>11</sup>, Osterix (OSX/SP7)<sup>12</sup> for osteogenesis. Besides, epigenomic  
44 programming provides another view of dynamic histone modifications and enhancer activity during  
45 mouse MSCs differentiation<sup>13, 14</sup>. Recently, studies focusing on the open chromatin regions have attracted  
46 attention to the rewiring of chromatin structure during adipogenesis and osteogenesis<sup>15</sup>. Even though great  
47 efforts have been made to reveal the biological process during lineage commitment of MSCs into  
48 osteoblasts and adipocytes, these studies were carried out with different cellular models having divergent  
49 genetic backgrounds. Thus, a holistic insight is needed through conducting those assays with an uniform  
50 model.

51 Taking advantage of the Hi-C technology, the spatial organization of the human genome has been  
52 revealed at different resolutions in different conditions. Although previous studies have reported the close  
53 relationship between the topologically associated domains (TADs) and many biological processes<sup>16, 17, 18</sup>,  
54 the structures of detailed chromatin interactions are still hidden due to the limited resolution. As the  
55 increasement of sequence depth, loop structures are able to be detected. Unlike TADs dividing  
56 chromosomal into different territories, chromatin loops directly bring distal elements into close proximity  
57 with their target promoters<sup>19</sup>, and the shortened distance between enhancer and promoter contributes to  
58 gene activation<sup>19, 20, 21</sup>. In addition, studies focusing on loop structures have uncovered the dynamic

59 interaction changes resulting in cell function determination<sup>22, 23</sup>. In terms of cell fate commitment, several  
60 studies have reported the chromatin organization rewiring during stem cell differentiation<sup>16, 23</sup>. However,  
61 to date, the investigation of how the hMSC chromatin structure response to adipogenic and osteogenic  
62 induction is still blank, especially for chromatin loops, yet is required to understand the underlying  
63 differentiation mechanism.

64 Here we performed high resolution Hi-C experiments before and after hMSC was differentiated into  
65 adipocytes and osteoblasts, and included RNA-seq, ChIP-seq and ATAC-seq at each stage simultaneously  
66 in order to provide a comprehensive insight of loop-mediated regulation patterns using data come from  
67 the same cellular model. We found differential contacted loops in each cell, and showed that the  
68 strengthened loops in both differentiation terminal cells are associated with gene activation, differential  
69 enhancer reprogramming and active TF binding. In particular, unique loops are essential for cell fate  
70 determination. Eventually, by constructing loop-mediated regulatory networks, we reveal the cell-specific  
71 regulation cascades and identify the controlling factors for adipogenesis and osteogenesis.

## 72 **Results**

### 73 *3D chromatin architectures of hMSC, adipocytes and osteoblasts*

74 In order to study chromatin conformation changes after hMSC differentiation, we carried out high-  
75 resolution Hi-C experiments before and after inducing hMSC differentiation into adipocytes (AC) and  
76 osteoblasts (OB) separately (Fig. 1a and Supplementary Fig. 1). At least six replicates were generated for  
77 each cell type. Hi-C data of each cell were combined to produce an average of 3.6 billion qualified paired-  
78 end reads after filtering out potentially artificial reads. We implemented HiCUP<sup>24</sup> to process Hi-C data,  
79 which resulted in ~2.5 billion valid read pairs (Supplementary Table 1). We estimated the average  
80 intrachromosomal contact probability in each cell. The contact probability curves were similar across  
81 cells (Supplementary Fig. 2a) and consistent with a previous report in lymphoblastoid cell line<sup>25</sup>,  
82 suggesting that the Hi-C data were qualified to detect intrachromosomal interactions. We further verified



83 the reproducibility through the high correlation of normalized contact frequency among replicates  
84 (Supplementary Fig. 2b).

85 Using the “map resolution” definition described by Rao *et al.*<sup>26</sup>, we constructed chromatin contact  
86 matrices at 50 kb, 10 kb and 2 kb resolutions, respectively. As shown in Fig. 1b, genome organization  
87 details showed up after zooming in the maps to higher resolutions. Particularly, local chromatin  
88 interactions were able to be detected at 2 kb resolution (the dark “pixels points” shown in Fig. 1b,  
89 rightmost).

90 The genome is partitioned into “megadomains”, of which the chromatin status can be indicated by A and  
91 B compartments<sup>26</sup>. The “megadomains” are further partitioned into small topologically associating  
92 domains (TADs) of condensed chromatin. To find out the chromatin conformation changes after hMSC  
93 differentiation from different genome scales, we firstly conducted PCA analysis and directional index  
94 method<sup>17</sup> to identify A/B compartment and TADs, respectively. We observed A/B compartment switch in  
95 response to differentiation induction (Supplementary Fig. 2c), reflecting different gene expression  
96 activity<sup>16, 25</sup>. As an example of adipogenesis associated gene *PPARG*, this gene is marked with B  
97 compartment (inactive status with negative PC1) in hMSC and OB but switched to active A compartment  
98 (positive PC1) in AC (Supplementary Fig. 2d). For TAD calling, among the 2,854 and 4,968 TADs  
99 identified in AC and OB (Supplementary Table 2), 88% and 70% were overlapped with TADs found in  
100 hMSC. Besides, the correlation of TAD signals showed high consistency across cells (Fig. 1c and  
101 Supplementary Fig. 2e). The conserved TADs between cells has been proved<sup>17</sup>, and our results confirmed  
102 this observation especially between hMSC and differentiated adipocytes and osteoblasts.

103 We next identified loop structures, and to also get a sense of how long-range interactome alters, we called  
104 chromatin interactions under 2 kb resolution (see Methods). We found 21,738, 12,460 and 16,930 loops  
105 in hMSC, AC and OB, respectively (Supplementary Table 3), and identified ~0.5 M significant  
106 interactions with 5% false discovery rate (FDR) control. In contrast with the stabilization of TADs, we  
107 uncovered many cell-specific loops and interactions which are difficult to be observed under low

108 resolutions. At least 65% of loops were distinct, and ~33% were shared across cells (Fig. 1d). As an loop  
109 shown in Fig. 1b (rightmost column), when comparing with hMSC, the contact frequency was elevated in  
110 OB but was weakened in AC. Notably, when we compared with 1 kb resolution map in GM12878, it  
111 turned out to be a cell-lineage-specific interaction. These genome intervals harbor a *IQCJ-SCHIP1*  
112 readthrough gene. *IQCJ* and *SCHIP1* mutated mouse exhibit skeletal defects, such as decreased bone  
113 mineral density and abnormal skeleton morphology<sup>27</sup>, highlighting the potential association between  
114 chromatin conformation alteration and cell function.

### 115 ***Active regulatory elements are enriched in loop anchors***

116 Further looking into chromatin loops and interactions, we were firstly interested to know what biological  
117 process was likely to take place at loop anchors or interacting fragments. We obtained chromatin states of  
118 enhancer, promoter, transcription regulatory and quiescent regions of hMSC, adipocyte and osteoblast  
119 from ChromHMM annotations to perform enrichment analysis (Supplementary Table 4; see Methods).  
120 Comparing with the genome, both loop anchors and interacting fragments were significantly enriched  
121 with active transcription regulatory elements and depleted of inactive elements across cells (Fig. 2a),  
122 supporting the opinion that promoter and regulatory elements are often interacting to facilitate gene  
123 expression<sup>28</sup>. We also analyzed region enrichment for both interacting fragments/anchors and their  
124 proximal length-match regions with 2 kb intervals (see Methods). Interestingly, comparing to the  
125 proximal regions, both loop anchors and interacting fragments tended to be more enriched with regulation  
126 signals but less occupied by transcription signals (Fig. 2b and Supplementary Fig. 3a; Supplementary  
127 Table 5). The difference was observed for CTCF peaks enrichment as well, which interacting fragments  
128 and loop anchors were more likely to harbor CTCF binding sites (Fig. 2c and Supplementary Fig. 3b).  
129 The significance was observed cross 3 cells and suggested that 3D chromatin folding is one of the  
130 important transcription regulatory features.

131 Most of the loops and interactions spanned a genomic distance within 1 M bp with a median up to 280 kb  
132 for loops and 200 kb for interactions (Fig. 2d and Supplementary Table 6). The similar distribution was

133 reported in IMR90 cells<sup>22</sup>. Comparing to loops, a larger fraction of chromatin interactions had distance  
134 less than 50 kb, suggesting the abundant intra-gene interactions. We next compared their stability towards  
135 hMSC differentiation. We found both loops and interactions changed dramatically that only less than 20%  
136 of interactions and 30% of loops in hMSC were stable in either AC or OB (Fig. 2e). As for loop anchors  
137 and interacting fragments, the loop anchors remained changeable as less than 50% of those in AC and OB  
138 were inherited from hMSC. Contrarily, the majority of interacting fragments (~73%) in AC and OB can  
139 be found in hMSC. Additionally, about 80% of interacting fragments in hMSC were stable after  
140 differentiation (Fig. 2e), suggesting that DNA interacting property in AC and OB is maintained after cell  
141 differentiation, but the contacting fragments are selectively picked when forming loop structures in  
142 different cells, also indicating that loop structures are more changeable and able to capture more cell-  
143 specific chromatin features than interactions. Together with the fact that chromatin loops spanning longer  
144 genomic distance are capable to find more long-range regulations, we therefore focused on chromatin  
145 loops in subsequent analyses.

146 Thus, we found prominent enrichment of transcription regulatory signals within loop anchors, suggesting  
147 the important role of loops on gene expression regulation.

### 148 ***Strengthened 3D chromatin architectures are accompanied by enhanced gene expression***

149 We generated RNA-seq data to analyze the relationship between chromatin conformation and gene  
150 expression. After quantifying gene expression level in each cell, we found that genes residing in active A  
151 compartment had higher expression level than which in inactive B compartment as expected  
152 (Supplementary Fig. 4a). Besides, gene expression increased as the distance between promoters and  
153 interacting fragments decreased (Fig. 3a). We next identified differential expressed (DE) genes in AC and  
154 OB (Fig. 3b, left panel). About 82.73 ~ 88.14% of up-regulated genes entirely reside in TADs (Fig. 3c).  
155 We then explored the genomic position of up-regulated genes towards chromatin loops and observed  
156 strong transcription signals of up-regulated genes around the loop anchors of AC and OB (Supplementary

157 Fig. 4b). These observations provide evidence from different Hi-C data scales that active genes usually  
158 locate at genomic area with detectable 3D structures.

159 We next sought to investigate whether chromatin structure alternation was associated with differential  
160 gene expression. Differentially contacted loops (DC loops) were found through a statistical identification  
161 approach (see Methods). After correcting with 5% FDR, 6,889 and 7,031 elevated DC loops were  
162 identified in AC and OB, respectively (hereafter refer to as AC/OB loops). We then counted nearby DC  
163 loops ( $\pm 1$  Mb around TSS) for each gene, and separated genes by loop counts difference between cells.  
164 As shown in Fig. 3d, gene expressions were significantly higher in cells having more DC loops  
165 (Wilcoxon signed-rank test). Furthermore, as up-regulated genes usually contain key regulators for cell  
166 differentiation, we explored the genetic position of these genes towards DC loops. The RNA-seq data of  
167 up-regulated genes showed strong transcription signals around AC and OB loop anchors, while as a  
168 comparison, were less obvious at random length and GC content matching regions (Fig. 3e). These  
169 suggest the colocalization of active genes and strengthened contacting regions.

170 Upon further diving into DE genes in AC and OB, we measured the distance between up-regulated gene  
171 TSSs and the nearest DC loop anchors. Genes under different distance to anchors were gathered to  
172 perform pathway enrichment analysis. We found that as the distance decreased, the enrichment of  
173 adipogenesis and osteogenesis related pathways increased. Especially, when under 50 kb, a significant  
174 proportion of up-regulated genes in AC and OB started to be involved in the biological process of cell  
175 function determination (Fig. 3b, right panel). Notably, significant enrichment under 1 kb distance  
176 indicated the connections of gene bodies/promoters with distal fragments, suggesting the possible cases of  
177 long-range promoter-enhancer regulation. Genes as cell fate determinants are supposed to be cell-specific  
178 activated, which, to our anticipation, should be partially modulated by cell-specific loop formation.  
179 Therefore, we found exclusive “unique loops” by comparing AC and OB loops, and loops with both  
180 anchors overlapping were referred to as “shared loops”. 4,899 and 5,062 unique loops were found in AC  
181 and OB, respectively. We next mapped up-regulated genes to either loops at different distance cut-off.

182 Genes were then tested for similarity between AC and OB (Jaccard similarity coefficient; Fig. 3f). The  
183 results showed that gene similarity under 50 kb distance were comparable between unique and shared  
184 loops. However, when the distance decreased, gene similarity decreased at unique loops, while increased  
185 at shared loops. This suggests the association between cell-specific gene activation and exclusive loop  
186 formation that is close to gene. Take obesity gene *APOE* as an example, which encodes a major protein of  
187 the lipid and lipoprotein transport system. The -1.01 kb upstream region from *APOE* was interacting with  
188 a downstream fragment forming a 50 kb loop. This unique AC loop was confirmed by the increased  
189 contact frequency and chromatin interaction in AC (Fig. 3f). As expected, the gene expression profile  
190 showed that *APOE* was specially activated in AC after differentiation. This evidence links cell-specific  
191 gene activation with unique loop formation.

#### 192 ***Strengthened loops after differentiation are associated with enhancer generation***

193 Distal enhancer-promoter contact is one of the most important features for loop formation<sup>29, 30</sup>. We next  
194 intended to investigate whether differential gene expression was caused by rearrangement of enhancer-  
195 promoter interactions. We initially generated ChIP-seq data of two enhancer-associated markers in 3 cells,  
196 histone H3 lysine 4 monomethylation (H3K4me1) and lysine 27 acetylation (H3K27ac). By computing  
197 and integrating peaks, we identified 128,179, 224,322 and 167,451 putative enhancers in hMSC, AC and  
198 OB, respectively (see Methods). We found limited number of shared enhancers between hMSC and AC  
199 (9.84%) or OB (12.15%), and the rest were considered as “differential enhancers”. The correlation test  
200 suggests that both histone signals are correlated between replicates but are cell-specific across cells (Fig.  
201 4a).

202 We then mapped putative enhancers to chromatin loops. The contact frequency of loops mapping with  
203 enhancers was significantly higher than loops without enhancers mapping (Fig. 4b), which was in  
204 accordant with the mechanism that enhancer-mediated interaction is associated with strengthened  
205 chromatin contact. To test whether DC loops were prone to harbor differential enhancers, we picked out  
206 enhancers that located in DC loops as “loop enhancers”. The H3K4me1 and H3K27ac signals on these

207 enhancers from different cells showed that both histone marks from AC and OB had exceeding signals in  
208 the same cell as loop enhancer annotated, while histone marks from hMSC loop enhancers were appeared  
209 to be shared across cells (Fig. 4c). This result hints that some enhancers in AC and OB could be inherited  
210 from hMSC, but enhancers in DC loops after differentiation are more cell specific. In addition, we also  
211 performed statistical enrichment analysis to see where the differential enhancers prefer to locate (see  
212 Methods). Consistently, AC and OB loops were significantly enriched with differential enhancers (fisher  
213 exact  $P = 3.22 \times 10^{-31}$ , OR = 1.20 for AC;  $P = 2.61 \times 10^{-41}$ , OR = 1.25 for OB), while both common and  
214 hMSC loops were enriched with shared enhancers (Fig. 4d). Thus, the significant enrichment of  
215 differential enhancers in AC and OB loops links novel enhancer generation with loop formation after  
216 differentiation.

### 217 *Cell fate determination is achieved by unique loops mapping with cell-specific enhancers*

218 We next were interested to know what role the enhancer may play in cell fate determination. We focused  
219 on unique enhancers and unique genes in AC and OB, which were exclusive enhancers and up-regulated  
220 genes comparing the other two cells. We hypothesized 4 enhancer-mediated regulation patterns resulting  
221 in elevated gene expression after differentiation (Fig. 4e, left panel). The first was regulated by unique  
222 enhancers located at unique gene promoters (upstream 5 kb from TSS). The second and third were both  
223 related to distal enhancer-promoter interactions but in unique loops and shared loops, respectively. The  
224 other situations were considered as the fourth pattern. Unique genes were mapped to each pattern  
225 according to their genetic locations. By counting unique gene numbers in each pattern, we observed that  
226 up to 57% of direct enhancer mapping genes were also undergone putative long-range regulation (Fig. 4e,  
227 right panel). Considering the majority of genes overlapping between 2D and 3D regulation, we then  
228 would like to know which one should play a predominant role. Previous study has shown that genes  
229 within a TAD are more co-expressed than do those in different TADs<sup>31</sup>. We therefore hypothesized that  
230 the intra-loop enhancers are able to synchronously regulate the genes locating in the same loop through  
231 chromatin looping, and by this way, leads to co-expression, even though the enhancers are mapped to

232 their local genes (referred to as “tag genes”). Therefore, we explored GTEx data (phs000424.v8.p2) to  
233 perform expression correlation between tag genes and other genes within the same loops. We used  
234 adipose as the target tissue for AC. Because the link between blood and bone biology has been widely  
235 discussed<sup>32, 33</sup>, we used whole blood as the target tissue for OB. We generated the background set in each  
236 tissue comprised of pairwise genes that were randomly selected from genome-wide, and performed  
237 correlation tests as well. The same length of multiple tests were conducted. The comparison of correlation  
238 coefficient (Pearson’s R) showed that genes located within the same loop were more co-expressed than  
239 background (t-test,  $P < 0.05$ ; Supplementary Fig. 5), supporting the enhancer synchronous regulation by  
240 taking advantage of chromatin loops.

241 Pathway enrichment analysis was then performed with unique genes in each pattern. The results  
242 recognized significant enrichment of adipogenesis and osteogenesis related pathways with genes directly  
243 mapped with unique enhancers or manipulated by putative long-range regulation in unique loops (Fig. 4f).  
244 The canonical enhancer adjacent to promoter directly regulates gene expression, which is the most  
245 acceptable way to manage cell determination. Here we showed that the 3D chromatin regulation function  
246 was also noticeable in favor of adipogenesis and osteogenesis. Intriguingly, adipogenesis pathways  
247 specially contained genes located within shared loops, however, we didn’t see such preference of  
248 osteogenesis pathways (Fig. 4f). This hints that some genes controlling adipogenesis lies in shared loops,  
249 and are adipocyte-specifically activated by the manipulation of particular enhancers. We observed the  
250 importance of insulin receptor signaling pathway for OB, which controls osteoblast development through  
251 stimulating osteocalcin production and suppressing Twist2<sup>34</sup>, and the enriched process of “response to  
252 FGF stimulus” in AC, which can be explained by favoring adipose tissue development and metabolism by  
253 several FGF family members<sup>35</sup>.

254 Taken together, we highlighted the important role of enhancer-centered regulation within chromatin loops,  
255 and cell-specific loops accompanied with cell-specific enhancers after hMSC differentiation are crucial to  
256 cell fate commitment.

257 ***Chromatin accessibility reveals loop-associated cell-specific regulator activation***

258 Chromatin accessibility is a critical condition for enhancer-anchored gene regulation. Thus, we identified  
259 chromatin accessible regions in AC and OB using ATAC-seq. Correlation analysis validated replicates  
260 concordance (Supplementary Fig. 6a). We finally identified 138,820 and 120,209 confidential peaks in  
261 AC and OB, respectively. We tested the colocalization and correlation between enhancer and chromatin  
262 accessibility, and found that H3K27ac was highly correlated with ATAC-seq peaks (Supplementary Fig.  
263 6b). Comparing with randomly selected regions (with GC and length matched), ATAC-seq peaks were  
264 successfully colocalized with H3K27ac marking regions (Fig. 5a). Notably, the ATAC-seq peak summits  
265 occur at H3K27ac depletion sites, which is identified as the available regions for TFs binding<sup>36</sup>. As the  
266 open accessibility at promoters, we detected accessible chromatin around promoters of up-regulated genes,  
267 and found that 84.71% and 68.82% of those in AC and OB were mapped with reliable ATAC-seq signals  
268 (peak filtering  $P < 0.05$ ). We next mapped ATAC-seq peaks to gene promoters and estimated the contact  
269 frequency within each peak as well as the corresponding gene expression levels. Using matched random  
270 regions as control, we confirmed that open chromatin is significantly associated with higher contact  
271 density and gene expression levels (Fig. 5b). This suggests the easier accessibility at chromatin interacting  
272 regions, which is essential to make DNA available for regulatory factor binding in favor of gene  
273 activation.

274 We further focused on interrogating whether loop formation is coupled with activating particular TF  
275 binding affinity after hMSC differentiation. We retrieved ATAC-seq data of hMSC and GM12878 from  
276 ENCODE<sup>37</sup>, and identified motifs enriched in open chromatin regions in each cell using the other 3 cells  
277 as background (see Methods). All known TF motifs were clustered and stratified with respect to their  
278 enrichment Z-scores (Fig. 5c). Notably, we predicted distinguished TF bindings in AC, however, some  
279 putative TF motifs had comparable Z-scores between OB and hMSC. We next classified 5 TF groups  
280 according to their cell-specific activation manner. Known adipogenesis associated TFs, like PPAR $\gamma$ ,  
281 C/EBP and AP-2, were successfully found in AC-specific motif group. Interestingly, some osteogenesis



282 related TF motifs were accessible in both hMSC and OB cells (Fig. 5c). The TFs distinction between  
283 adipogenesis and osteogenesis has been reported by Rauch *et al.* In their paper, they found *de novo* TF  
284 activation during adipogenesis, while activation of MSC TFs is required in response to osteogenic  
285 stimulation<sup>15</sup>, which is in agreement with the difference of TF clusters showing here. These cellular active  
286 motifs were collected as “cell-regulatory TF motifs”. Next, to find out which genomic position is prone to  
287 contain cell-regulatory TF motifs, we performed enrichment analysis in DC loops and linear chromatin  
288 synchronously (see Methods). Chromatin accessible regions with AC-regulatory and OB-regulatory TF  
289 binding were significantly enriched in AC loops and OB loops, respectively (Fisher test,  $P < 0.05$ ; Fig.  
290 5d). On the other hand, the results indicated that the strengthened loops in hMSC were less involved in  
291 cell differentiation. Considering the differentiation related genes usually remain inactive/poised in hMSC,  
292 this observation points out a link between gene inactivity and loop disconnection. The linear chromatin  
293 regions showed particular enrichment with OB-regulatory TF motifs (Fisher test,  $P < 0.01$ ; Fig. 5d),  
294 suggesting that, to some extent, osteogenic differentiation are also modulated by 2D regulation. This  
295 might be the reason that hMSC and OB share some effective TFs. In addition, we retrieved Hi-C data at  
296 these cell-regulatory TF motifs to explore their contact frequency. We detected more frequent chromatin  
297 contact at the AC-regulatory TF motifs in AC cell than that in hMSC cell, which significantly passed the  
298 statistic test (U test,  $P < 2.2 \times 10^{-16}$ ; Fig. 5e). As for OB-regulatory TF motifs, however, the comparison  
299 showed a trend for significant difference between OB and hMSC (U test,  $P = 0.066$ ; Fig. 5e), which can  
300 be explained by the enrichment results that part of these putative TF binding sites particularly locate at  
301 genomic regions free from spatial interaction in both cells.

302 Next, to investigate how the accessible regulatory TF motifs are involved in long-range regulation of  
303 adipocyte and osteoblast commitment, we selected unique AC/OB loops with unique enhancer and gene  
304 promoter interaction, followed by mapping enhancers and promoters to AC and OB regulatory motifs  
305 separately. By this way, we screened out 25 and 40 unique expressed genes in AC and OB, respectively  
306 (Supplementary Table 7). Among them, we successfully recognized adipocyte functional genes *PDK4*<sup>38</sup>,

307 *IRS2*<sup>39</sup>, *SULF2*<sup>40</sup>, *PTGSI*<sup>41</sup> etc. and osteoblast functional genes *RUNX2*<sup>42</sup>, *SIGLEC15*<sup>43</sup>, *SCMH1*<sup>44</sup> etc. The  
308 genome browser illustrations for *IRS2* and *RUNX2* (Fig. 5f) show unique loops connecting distal unique  
309 enhancers with promoters of candidate transcript, and meanwhile, the differential ATAC-seq signals  
310 make both enhancer and promoter accessible to achieve cell-specific gene activation, and eventually  
311 promote cell commitment.

312 Together, we revealed a close connection between accessible chromatin and loop formation after hMSC  
313 differentiation. Moreover, coupling with cell-specific enhancer mapping, this connection is important for  
314 cell-determined gene activation under long-range chromatin regulation.

315 ***Comprehensive loop-mediated regulatory networks indicate key regulators for adipogenesis and***  
316 ***osteogenesis***

317 So far, we have emphasized the association between chromatin loops with gene regulation by mapping  
318 different regulatory elements. We next sought to construct regulatory networks to tie multi-omics data  
319 together and find out the prospective loop-mediated regulation cascades for adipogenesis and  
320 osteogenesis. The network was constructed based on unique AC/OB loops. We assumed that these loops  
321 shorten the spatial distance between distal enhancers and target genes in a cell-specific manner, which as  
322 a result, makes TFs easily bind to target genes. Fig. 6a shows the regulatory model that is also our  
323 strategy to build up networks. Briefly, the ATAC-seq peaks containing cell-specific regulatory TF motifs  
324 were first used to screen loops with both accessible anchors. Loop anchors were next mapped with  
325 promoters of gene transcripts at the one side and the unique enhancers at another side. TF binding events  
326 retrieved from GTRD<sup>45</sup> were used to identify TFs binding at both enhancers and promoters (see Methods).  
327 After weighting TFs and target genes with expression fold change, focusing on unique expressed genes,  
328 and filtering by weight > 1, we identified 23 and 38 genes involved in loop-mediated regulatory networks  
329 in AC and OB, respectively (Fig. 6b; Supplementary Table 8). Among 14 and 19 genes in AC and OB  
330 regulatory networks that can be found detectable mutated mouse phenotypes from Mouse Genome  
331 Informatics (MGI) database<sup>27</sup>, 8 and 6 genes were annotated with adipose and skeleton relevant

332 disfunctions, respectively (Supplementary Table 9). Among all gene nodes, *CELSR1* and *PRLR* are linked  
333 to 55 and 52 TFs, which are the maximum number of TF annotations among genes in AC and OB  
334 regulatory networks. Mouse with deficient *CELSR1* and *PRLR* gene are associated with decreased body  
335 size and decreased bone mass, respectively (Supplementary Table 9), emphasizing the important  
336 biological functions of these two genes. Among all TF nodes, the ones that involved in adipogenesis and  
337 osteogenesis had more abundant edges than others (Fig. 6b). Two representative genes are *IRS2* and  
338 *RUNX2* that are essential to adipocyte<sup>39</sup> and osteoblast<sup>42</sup> differentiation, respectively. We successfully  
339 detected a unique AC loop anchored at *IRS2* promoter and interacted with a distal enhancer (with 90 kb  
340 chromatin interval) (Fig. 6d). We showed the possible binding of 20 TFs at both *IRS2* promoter and distal  
341 enhancer (Fig. 6c, upper panel), and intriguingly, we found the particular binding affinity of two genome  
342 architectural proteins CTCF and YY1, supporting the long-range interaction. We have revealed the  
343 dominant ATAC-seq and H3K27ac signals focusing *IRS2* (Fig. 5f), here, we confirmed the CTCF binding  
344 at both anchors containing *IRS2* promoter and distal unique enhancer by obtaining ChIP-seq data from  
345 human adipose (GSE105994)<sup>37</sup> (Fig. 6d, upper panel). The prominent *IRS2* expression in AC reflects the  
346 cell-specific activation consequence. Similarly, we found a regulatory network especially connecting a  
347 *RUNX2* transcript promoter with a 770 kb interval region whose cell-specific accessibility and enhancer  
348 property were indicated through ATAC-seq and enhancer mapping (Fig. 5f). The TFs screening further  
349 suggested 9 binding events (Fig. 6c, lower panel). Previous studies have characterized the irreplaceable  
350 role of ESR1 on osteoblast development<sup>46</sup>. We therefore obtained ESR1 ChIP-seq data from  
351 osteosarcoma cell (GSE26110)<sup>47</sup>. The ESR1 peaks were appeared not directly at but closely to both loop  
352 anchors (Fig. 6d, lower panel), which should be explained by the frequent occupation of structural  
353 proteins at loop anchors. Here, we demonstrated that the regulatory network is robust to illustrate loop-  
354 mediated gene regulation. We believe that our strategy is also applicable for finding novel target genes  
355 functioning as cell fate determinant during hMSC differentiation.

356 ***eQTL variants are linked with target genes through chromatin loops***

357 We next were interested in whether eQTLs can be linked with target genes through loop formation. We  
358 included eQTL data from adipose and blood-derived tissues from GTEx and mapped snp-gene pairs to  
359 AC or OB loops. The Q-Q plots indicated a superior significance of eQTL associations at AC/OB loops  
360 than that at hMSC loops (Fig. 7a; Supplementary Fig. 7), and the dominance was even more obvious than  
361 eQTLs without loop mapping (Kolmogorov-Smirnov test  $P < 2.2 \times 10^{-16}$ ). This indicates that the eQTLs  
362 supporting by DC loops have stronger association with gene expression, and confirms the loop-mediated  
363 regulation mechanism. Hence, in light of the eQTL dominance at DC loops, we added eQTL information  
364 to regulatory networks. The SNPs locate at TF binding sites and impact target gene expression were  
365 linked to the networks. Eventually, we suggest 14 and 20 genes that are possibly activated by loop-  
366 mediated regulatory cascades in AC and OB, respectively (Supplementary Table 10). Particularly, we  
367 identified 5 and 2 SNPs (pruning with LD < 0.8), recognized as the eQTL sites for *IRS2* and *RUNX2*,  
368 potentially interrupt TFs binding and impact the long-range regulation (Fig. 7b).

369 Taken together, we have revealed the associated loop changes after inducing hMSC to adipogenesis and  
370 osteogenesis differentiation. We also suggested a close relationship between cell-specific loops and  
371 adipocyte/osteoblast determination, which is expected to provide better understanding of the controlling  
372 factors for hMSC differentiation.

## 373 **Discussion**

374 Here, taking advantage of high resolution Hi-C data, we've recognized chromatin loops for hMSCs and  
375 the differentiated adipocytes and osteoblasts. We also performed the comprehensive assessment of  
376 mRNA expression, histone modification as well as chromatin accessibility. After leveraging these data,  
377 we identified differential contact loops in each cell and screened out unique loops for differentiated cells.  
378 Subsequently integrative analyses linked strengthened loop formation to gene activation and suggested  
379 significant enrichment of differential enhancers and TF motifs at strengthened loops. Furthermore, we  
380 linked unique loops with cell-specific enhancers and accessible TF motifs, and identified the robust long-  
381 range gene regulation mechanism responsible for cell fate determination. Finally, we constructed

382 regulatory networks involved in adipocyte and osteoblast commitment and emphasized the loop-mediated  
383 regulation cascades especially for *IRS2* and *RUNX2* that leads to adipogenesis and osteogenesis,  
384 respectively. Overall, our study provides the first investigation of 3D chromatin structure changes after  
385 hMSC were stimulated to adipogenic and osteogenic differentiation. According to the robust analytical  
386 evidence, we emphasize the long-range regulatory mechanisms for hMSC differentiation.

387 The cell fate determination during hMSC differentiation requires cell-specific genes activation or  
388 repression. Here, we focused on active regulatory elements attempting to reveal the mechanisms that  
389 underlie the gene activation after hMSC responding to differentiation induction. Although we rarely  
390 mentioned whether differentiation-repressed genes are inhibited by prohibiting loop interaction during  
391 this process, the evidence that highly expressed genes in hMSC had lower interaction strength in  
392 differentiated cells shows the inhibition of genes by disrupting the 3D structures during cellular function  
393 alternation. Further investigation towards these genes is needed to confirm their effect on hMSC function  
394 maintenance.

## 395 **Methods**

### 396 *Cell culture and hMSC differentiation*

397 Primary human umbilical cord derived hMSCs were obtained frozen from Shaanxi Stem Cell Engineering  
398 Co., Ltd from 1 donor who have signed the informed consent for this study. Cells were thawed and  
399 expanded for an additional passage for all the subsequent experiments. hMSC cells were seeded at a  
400 density of  $1 \times 10^4$  cells/cm<sup>2</sup> and cultured at 37 °C, 5% CO<sub>2</sub> in Dulbecco modified Eagle medium (DMEM;  
401 GE) supplemented with 10% fetal bovine serum (FBS; GIBCO) and 1% antibiotics (penicillin 100 U/ml,  
402 streptomycin 100 µg/ml; Solarbio Co., Ltd). When 80% confluence was reached, part of the cells was  
403 harvested, and the left were switched to differentiation culture medium to induce adipogenesis and  
404 osteogenesis.

405 For osteoblastic differentiation, hMSC cells were grown in DMEM medium supplemented with 10% FBS,  
406 1% penicillin/streptomycin, 10 mM glycerol-2-phosphate (Sigma), 50  $\mu$ M L-ascorbic acid (Sigma), and  
407 100 nM dexamethasone (Sigma) for 21 days. Medium was replaced every 3 days.

408 Adipogenic differentiation was induced in hMSC cells cultured by alternately supplying treatment of  
409 solution A and B. Solution A: DMEM medium containing 10% FBS, 1% penicillin/streptomycin, 10  
410 mg/L insulin (Novo Nordisk), 1  $\mu$ mol/L dexamethasone, 0.5 mmol/L IBMX (Sigma), 100  $\mu$ mol/L  
411 indometacin (Sigma). Solution B: DMEM medium containing 10% FBS, 1% penicillin/streptomycin,  
412 10mg/L insulin. Cells were firstly cultured in solution A for 3 days and were additionally supplied with  
413 solution B for another day. Cells were harvested after adipogenic induction for 15 days.

414 Cell differentiation status were further verified at 4 time points (0d, 5d, 10d, 15d for adipogenic  
415 differentiation; 0d, 7d, 14d, 21d for osteogenic differentiation) through microscopic identification, Oil  
416 Red O/Alizarin Red S staining and qRT-PCR quantification of marker genes (Supplementary Fig. 1). The  
417 staining areas were counted by ImageJ<sup>48</sup> software at each time point, and the statistical significance was  
418 indicated by t-test.

#### 419 ***Hi-C library preparation and sequencing***

420 6 technical replicates of adipocytes and osteoblasts, and 7 technical replicates of hMSC were generated  
421 after cell differentiation with each replicate containing about  $1 \times 10^7$  cells. In situ Hi-C was next  
422 performed on each replicate using methods as previously described<sup>26</sup>. Briefly, after harvesting from plates,  
423 cells were crosslinked with 1 ml of freshly made 1% formaldehyde solution and incubated for 10 min at  
424 room temperature. The reaction was quenched by adding glycine solution to a final concentration of 0.2  
425 M. Cells were lysed and chromatin was next digested with 200 U of MboI restriction enzyme for 16 h at  
426 37  $^{\circ}$ C. Digested DNA ends were labeled using biotinylated nucleotides and incubated at 37  $^{\circ}$ C for 90 min.  
427 Fragments were proximity ligated by adding T4 DNA ligase and were incubated at 4  $^{\circ}$ C for 1 h, followed  
428 by 4 h at room temperature. Samples were supplemented with SDS, Proteinase K, and NaCl to reverse  
429 crosslinking, and incubated overnight at 65  $^{\circ}$ C. After that, DNA fragments were purified and dissolved.

430 Purified DNA fragments were sheared to a size of 300-500 bp. Ligation junctions labeled with biotin  
431 were subsequently pulled down using streptavidin C1 beads and prepared for Illumina sequencing. TA  
432 cloning was carried out to examine the library quality. Hi-C libraries were sequenced on an Illumina  
433 HiSeq X Ten system. The Hi-C experiment and library sequencing were performed by Novogene Co., Ltd,  
434 Beijing, China.

#### 435 *RNA-seq data generation*

436 Two technical replicates were generated for each cell type. Total RNA was extracted from samples using  
437 the TRIzol (Invitrogen) method<sup>49</sup>. RNA concentration and purity were evaluated with a NanoDrop  
438 spectrophotometer (Thermo Fisher). 6 libraries were constructed under manufacturer's instructions and  
439 were then sequenced on the Illumina HiSeq X Ten platform using the 150-bp pair-end sequencing  
440 strategy. Finally, an average of 47 M pair-end reads were obtained per sample.

#### 441 *Chromatin immunoprecipitation assay*

442 ChIP assay was performed using the SimpleChIP Enzymatic Chromatin IP Kit (Cell Signaling  
443 Technology) as previously described<sup>50</sup>. Briefly, cells were crosslinked with 1% formaldehyde. After  
444 quenching with glycine solution, cells were rinsed, pelleted and resuspended in cold PBS, and then  
445 resuspended and pelleted twice with buffer A and B, respectively. Nucleus were digested with  
446 Micrococcal Nuclease (2,000 gel units/ $\mu$ L). The digestion reaction was deactivated with 0.5 M EDTA.  
447 The nucleus were then pelleted, and sediment resuspended in ChIP buffer using protease inhibitor  
448 cocktail. The lysate was sonicated with the VirTis Virsonic 100 Ultrasonic Homogenizer/Sonicator for 3  
449 pulses. After centrifuging, the supernatant was collected and was immunoprecipitated with H3K4me1 and  
450 H3K27ac antibodies (Abcam) or normal immunoglobulin G (IgG) as a negative control, and precleared  
451 with agarose beads. DNA protein complex was then precipitated with agarose beads, eluted from the  
452 beads, and reversely cross-linked by 5M NaCl and Proteinase K. Libraries for ChIP-seq were prepared  
453 following Illumina protocols. Libraries were next sequenced on the Illumina HiSeq X Ten platform  
454 configured for 150-bp pair-end reads.

455 ***ATAC-seq data generation***

456 ATAC-seq libraries were constructed for adipocytes and osteoblasts following the original protocol<sup>51</sup>. In  
457 brief, two hundred thousand cells were lysed with cold lysis buffer (10 mM Tris-HCl, pH 7.4, 10 mM  
458 NaCl, 3 mM MgCl<sub>2</sub> and 0.03% Tween20), and centrifuged at 500g for 8 min at 4°C. The supernatant  
459 was carefully removed, and the nuclei was resuspended with Tn5 transposase reaction mix (25 μl  
460 2× TD buffer, 2.5 μl Tn5 transposase and 22.5 μl nuclease-free water) (Illumina) at 37°C for 30  
461 min. Immediately after the transposition reaction, DNA was purified using a Qiagen MinElute kit.  
462 Libraries were sequenced on an Illumina HiSeq X Ten sequencer to an average read depth of 52 million  
463 pair-end reads per sample. The ATAC-seq experiment and library sequencing were performed by  
464 Frasergen Bioinformatics Co., Ltd, Wuhan, China.

465 ***qRT-PCR***

466 Cells at each differentiation time point were partially collected to detect marker gene expression. Total  
467 RNA was isolated with Trizol reagent (Invitrogen), and was converted to cDNA with reagents purchased  
468 from Vazyme Biotech Co., Ltd. PCR procedure was performed using Qigen SYBR Green PCR Kit  
469 (Qiagen) and was operated with Bio-Rad System (CFX Connect™, Bio-Rad). The following specific  
470 oligonucleotide primers were used: *PPARG* (5'- AGCCTCATGAAGAGCCTTCCA, 3'-  
471 TCCGGAAGAAACCCTTGCA), *CEBPD* (5'- GGTGCCCCGCTGCAGTTTC, 3'-  
472 CACGTTTAGCTTCTCTCGCAGTTT), *ALPL* (5' - CCTGCCTTACTAACTCCTTAGTGC, 3' -  
473 CGTTGGTGTGAGCTTCTGA), *RUNX2* (5' - GCGCATTCTCATCCCAGTA, 3' -  
474 GGCTCAGGTAGGAGGGGTAA), *BGLAP* (5' - AGCGAGGTAGTGAAGAGAC, 3' -  
475 GAAAGCCGATGTGGTCAG), *COL1A1* (5' - TTTGGATGGTGCCAAGGGAG, 3' -  
476 AGTAGCACCATCATTCCACGA). All the experiments were conducted following the manufacturer's  
477 instructions.

478 ***Computational analysis***



#### 479 ***Hi-C data processing***

480 Hi-C reads from each replicate were aligned (hg19), filtered and paired using HiCUP pipeline<sup>24</sup> with  
481 parameters (--longest 800 --shortest 150). In summary, ~0.53 B (~81% of total read pairs) paired reads  
482 uniquely mapped to the genome. After removing self-ligation and invalid pairs, ~0.46 B (~61% of total  
483 read pairs) valid pairs were remained for subsequent analysis (Supplementary Table 1). Valid pairs for  
484 replicates of each cell type were combined to generate raw contact matrices at different binning  
485 resolutions. We next normalized the raw contact matrices using ICE normalization<sup>52</sup> with parameters (--  
486 filter\_low\_counts\_perc 0.02 --eps 0.1 --remove-all-zeros-loci). To evaluate Hi-C data reproducibility,  
487 interacting counts at each bin were retrieved at 40 kb resolution, and Pearson correlation test was  
488 implemented between replicates.

#### 489 ***TAD calling and TAD signal calculation***

490 TADs were called with Domaincalling pipeline as Dixon et al. described<sup>17</sup>. The ICE-normalized matrix  
491 was subjected to calculate DI (Directionality Index) values, and the results as input were applied with  
492 Hidden Markov Model (HMM) model to call TADs. We executed this TAD calling procedure at 40 kb  
493 binning resolution in this study. In total, 3,142, 2,854 and 4,968 TADs were identified for hMSC,  
494 adipocytes and osteoblasts, respectively.

495 To compare TAD structure between different cells, we evaluate TAD signals that indicate the strength of  
496 TAD contact. We used the method described by Ke et al.<sup>16</sup> to calculate TAD signals. First, Intra-  
497 chromosomal maps were prepared at 40 kb resolution. The TAD signal for each bin was next calculated  
498 as the log<sub>2</sub> ratio of the number of normalized upstream-to-downstream interactions within a 2 Mb region.  
499 Bins with less than 10 counts within either upstream or downstream region were filtered. TAD signals  
500 were then used to perform Pearson correlation test between cell types.

#### 501 ***Identification of A/B compartments and chromatin interactions***

502 Hi-C output from HiCUP was transformed to compatible file format to work with HOMER software<sup>53</sup>.  
503 We next used HOMER to calculate PC1 values and identify significant chromatin interactions. A/B  
504 compartments were determined using the “runHiCpca.pl” function with the parameters (-res 25000 -  
505 window 25000 -pc 1). The signs of the PC1 values were used to assign the chromatin into A compartment  
506 (positive PC1 values) and B compartment (negative PC1 values). For chromatin interactions, we used  
507 “findHiCInteractionsByChr.pl” function to search for pairs of fragments that have a greater number of Hi-  
508 C reads than expected by chance. Interactions were searched with the parameters (-res 1000 -superRes  
509 2000 -maxDist 2000000). The significant interactions were identified by FDR  $q < 0.05$ .

#### 510 *Identification of chromatin loops*

511 Loops were called by two computational strategies. The first is “findTADsAndLoops.pl” function  
512 packaged in HOMER. It was utilized to call loops at 2kb resolution with parameters (-res 2000 -window  
513 2000 -minDist 6000 -maxDist 1000000). The other software, HiCCUPS<sup>26</sup>, was applied separately to  
514 identify loops at 5 and 10 kb resolutions with default parameters. Finally, loops from two methods were  
515 pooled together, which yields a list of 21,738, 12,460 and 16,930 loops in hMSC, adipocytes and  
516 osteoblasts, respectively.

#### 517 *Statistical identification of differential contact loops*

518 To find differential contact loops in adipocytes and osteoblast comparing with hMSC, we first merged  
519 loops in chosen cells into a union set by “merge2Dbcd.pl” function in HOMER with the default  
520 parameters. Next, we counted raw contact frequencies within loops from filtered Hi-C read pairs of each  
521 cell replicate, and built a contact frequency matrix with respect to loop sets and replicates. The contact  
522 frequency matrix was then used as input in edgeR<sup>54</sup>. After normalizing by the trimmed mean of M values  
523 (TMM), differential contact loops between hMSC and adipocytes or osteoblasts were identified using a  
524 generalized linear model (GLM) likelihood ratio test. The significance was determined by  $P < 0.01$ .

#### 525 *Genomic elements enrichment*

526 Chromatin states from an imputed 25-state model of bone marrow derived MSC (E026), MSC derived  
527 adipocyte (E023) and osteoblast (E129) were obtained from the Roadmap Epigenomics project  
528 ([https://personal.broadinstitute.org/jernst/MODEL\\_IMPUTED12MARKS/](https://personal.broadinstitute.org/jernst/MODEL_IMPUTED12MARKS/)). The annotation details were  
529 listed in Supplementary Table 5. We compared the chromatin elements enrichment between Hi-C  
530 interacting fragments/loop anchors and other genomic regions, and between interacting fragments/loop  
531 anchors and their disjoint 2 kb away regions. For comparing with genomic regions, we focused on  
532 enhancer, promoter and positive regulatory associated and additional quiescent annotations  
533 (Supplementary Table 4). Firstly, regions were segmented into 200 bp bin pools. Randomly selection was  
534 executed 1,000 times, and 1,000 bins were selected from each bin pools at each time. Proportions of bins  
535 overlapped with annotation states were calculated at each time for interacting fragments and genomic  
536 regions. Z-test was used to find the significant difference of overlapping.

537 For comparing between the interacting fragments and their disjoint 2 kb away regions, enrichment was  
538 estimated by XGR package<sup>55</sup> implemented in R. 16 annotations associated with transcription, enhancer  
539 and promoter were selected to test enrichment in 3 cells (Fig. 2d). Enrichment Z-scores resulting from  
540 XGR were plotted to show different enrichment preference between two regions. Statistical significance  
541 for comparing CTCF enrichment between loop anchors/interaction fragments and their 2 kb interval  
542 regions were calculated with treating 2 kb interval regions as background (Fig. 2c and Supplementary Fig.  
543 3b).

#### 544 ***RNA-seq data processing and differential expression analysis***

545 RNA-seq reads were aligned to human genome (built from the Gencode v19 gene annotation) using  
546 STAR<sup>56</sup> with default parameters. Duplicates were marked by PicardTools (v2.18.9)<sup>57</sup>. Duplicate and low  
547 mapping quality reads (MAPQ < 30) were removed for subsequent analyses. The transcript and gene-  
548 based expression levels were quantified and normalized to transcript per million (TPM) using RSEM  
549 (v1.3.0)<sup>58</sup>. The expected counts of genes/transcripts from RSEM were next normalized by the TMM  
550 method. Genes/transcripts that had TMM count >1 in at least 50% of the samples were selected, and were

551 transformed to estimate the mean-variance relationship by voom function implemented in limma  
552 package<sup>59</sup> from R. The data were then tested for differential expression by linear model.

### 553 *ChIP-seq data processing and enhancer analysis*

554 ChIP-seq reads were aligned to the human genome assembly (hg19) using Bowtie2<sup>60</sup> with default settings.  
555 Duplicate reads and reads with MAPQ < 30 were discarded. MACS2<sup>61</sup> was used to perform peak calling  
556 with the following parameters (-g hs -p 0.01 --nomodel --extsize 147 --keep-dup all). Peaks of H3K4me1  
557 and H3K27ac were found for each cell replicate separately. Replicated peaks were identified by at least  
558 50% overlap. Putative enhancers were further defined by merging replicated peaks of H3K4me1 and  
559 H3K27ac in each cell type.

### 560 *Enhancer enrichment in differential contact loops*

561 Overlapped enhancers between adipocytes/osteoblasts and hMSC were defined by at least 80% of the  
562 enhancer region in differentiated cell were overlapped with the enhancer in hMSC. The rest were  
563 regarded as differential enhancers. BEDtools “intersect” function was used to find overlapped enhancers  
564 in adipocytes and osteoblasts. We investigated whether overlapped or differential enhancers were  
565 enriched in differential contact loops. Fisher test was applied to find enrichment significance. Enrichment  
566 direction was indicated by odds ratio.

### 567 *ATAC-seq data processing and peak calling*

568 Adaptors were trimmed from ATAC-seq reads sequences using custom python scripts. Pair-end reads  
569 were aligned to hg19 using Bowtie2. Duplicate reads and reads with MAPQ < 30 were discarded. Reads  
570 mapping to the mitochondria and chromosome Y were removed. After filtering, the qualified reads were  
571 subjected to MACS2 to call peaks for each sample with parameters (-q 0.05 --nomodel --shift -100 --  
572 extsize 200 --keep-dup all). Peaks mapped to the consensus excludable ENCODE blacklist  
573 (<http://hgdownload.cse.ucsc.edu/goldenPath/hg19/encodeDCC/wgEncodeMapability/>) were filtered. The  
574 peaks between replicates of the same cell type were merged using BEDTools<sup>62</sup>. In total, we identified

575 138,820 and 120,209 peaks from adipocytes and osteoblasts, respectively. In order to compare TFs  
576 footprints of adipocytes and osteoblasts with hMSC and another unrelated cell, we obtained ATAC-seq  
577 peaks information of hMSC from Rauch et al. (GSE113253)<sup>15</sup> and GM12878 cell line from Buenrostro *et*  
578 *al.* (GSE47753)<sup>51</sup>.

#### 579 ***Colocalization between ATAC-seq and H3K27ac ChIP-seq***

580 Complementary genomic regions to ATAC-seq peaks were selected for adipocytes and osteoblasts, from  
581 which peak length matching regions were randomly generated. The GC contents of random regions were  
582 calculated by BEDtools. Regions with GC content matching with peaks were integrated to construct the  
583 matching region set. ATAC-seq reads and H3K27ac ChIP-seq reads mapped to ATAC peaks or matching  
584 regions were counted and normalized by RPKM in each cell using deepTools software<sup>63</sup>. Colocalization  
585 profiles were plotted at a 10 kb region flanking the ATAC peak summits/region midpoints.

#### 586 ***TF motifs enrichment in ATAC-seq peaks***

587 The HOMER motif finding function “findMotifsGenome.pl” was used to detect enriched TF motifs in  
588 ATAC-seq peaks with parameters (-size 200 -mask) and the hg19 genome reference. For background  
589 chosen, we found motifs within ATAC-seq peaks identified for hMSC, adipocytes, osteoblasts and  
590 GM12878 using the union peak set as background. 413 known motifs available in HOMER were used to  
591 test for enrichment. The enrichment Z-scores were used to compare and find cell-regulatory motifs across  
592 cells.

#### 593 ***Regulatory networks construction***

594 We constructed regulatory networks using multi-omic data, including loop structures, gene expression  
595 levels, enhancers and chromatin accessible regions, as well as TFs binding sites collecting by Yevshin *et*  
596 *al.*<sup>45</sup>. The anchors were firstly rescaled to 10 kb, and then searched for ATAC-seq peaks. Unique loops  
597 with both anchors mapping with ATAC-seq peaks were kept. The unique gene promoters were consisted  
598 of -2 kb to +1 kb regions to TSS of each gene transcript. Next, one side of loop anchors was mapped with

599 those promoters while the other side was mapped with unique enhancers. Both promoters and enhancers  
600 were then mapped with TFs binding sites. By this way, the gene and TFs were connected, and the edge  
601 weight was defined as:

$$W = \log_2 G_{fc} \times \log_2 TF_{fc} \times \log_5 N$$

602 Where  $G_{fc}$  and  $TF_{fc}$  refer to expression fold change of target gene and TFs after differentiation.  $N$  refers to  
603 the sum of peak caller numbers that are able to recognize the binding events at promoters and enhancers.  
604 The node weight was defined as the expression fold change. The TFs binding sites and target genes were  
605 next utilized to search for eQTLs ( $P < 0.05$ ). The eQTLs data from subcutaneous and visceral omentum  
606 adipose, LCLs and whole blood were derived from GTEx database (v8)<sup>64</sup>. SNPs located at the TFs  
607 binding sites and effecting the same genes as the loop anchors interacting with were subsequentially  
608 added to the networks. The weights between SNPs and TFs were defined as  $-\log_{10}$  transformed eQTL  $P$   
609 values.

610

## 611 **References**

- 612 1. Brunmeir R, Wu J, Peng X, Kim SY, Julien SG, Zhang Q, *et al.* Comparative Transcriptomic and  
613 Epigenomic Analyses Reveal New Regulators of Murine Brown Adipogenesis. *PLoS genetics* 2016,  
614 **12**(12): e1006474.
- 615
- 616 2. Menssen A, Haupl T, Sittinger M, Delorme B, Charbord P, Ringe J. Differential gene expression  
617 profiling of human bone marrow-derived mesenchymal stem cells during adipogenic  
618 development. *BMC genomics* 2011, **12**: 461.
- 619
- 620 3. Zhang W, Dong R, Diao S, Du J, Fan Z, Wang F. Differential long noncoding RNA/mRNA  
621 expression profiling and functional network analysis during osteogenic differentiation of human  
622 bone marrow mesenchymal stem cells. *Stem cell research & therapy* 2017, **8**(1): 30.
- 623
- 624 4. Piek E, Sleumer LS, van Someren EP, Heuver L, de Haan JR, de Grijs I, *et al.* Osteo-transcriptomics  
625 of human mesenchymal stem cells: accelerated gene expression and osteoblast differentiation  
626 induced by vitamin D reveals c-MYC as an enhancer of BMP2-induced osteogenesis. *Bone* 2010,  
627 **46**(3): 613-627.
- 628
- 629 5. Scheideler M, Elabd C, Zaragosi LE, Chiellini C, Hackl H, Sanchez-Cabo F, *et al.* Comparative  
630 transcriptomics of human multipotent stem cells during adipogenesis and osteoblastogenesis.  
631 *BMC genomics* 2008, **9**: 340.
- 632
- 633 6. Siersbaek R, Nielsen R, Mandrup S. PPARgamma in adipocyte differentiation and metabolism--  
634 novel insights from genome-wide studies. *FEBS letters* 2010, **584**(15): 3242-3249.
- 635
- 636 7. Lehrke M, Lazar MA. The many faces of PPARgamma. *Cell* 2005, **123**(6): 993-999.
- 637
- 638 8. Lefterova MI, Haakonsson AK, Lazar MA, Mandrup S. PPARgamma and the global map of  
639 adipogenesis and beyond. *Trends in endocrinology and metabolism: TEM* 2014, **25**(6): 293-302.
- 640
- 641 9. Rosen ED, Hsu CH, Wang X, Sakai S, Freeman MW, Gonzalez FJ, *et al.* C/EBPalpha induces  
642 adipogenesis through PPARgamma: a unified pathway. *Genes & development* 2002, **16**(1): 22-26.
- 643
- 644 10. Madsen MS, Siersbaek R, Boergesen M, Nielsen R, Mandrup S. Peroxisome proliferator-activated  
645 receptor gamma and C/EBPalpha synergistically activate key metabolic adipocyte genes by  
646 assisted loading. *Molecular and cellular biology* 2014, **34**(6): 939-954.
- 647
- 648 11. Ducy P, Zhang R, Geoffroy V, Ridall AL, Karsenty G. Osf2/Cbfa1: a transcriptional activator of  
649 osteoblast differentiation. *Cell* 1997, **89**(5): 747-754.
- 650

- 651 12. Nakashima K, Zhou X, Kunkel G, Zhang Z, Deng JM, Behringer RR, *et al.* The novel zinc finger-  
652 containing transcription factor osterix is required for osteoblast differentiation and bone  
653 formation. *Cell* 2002, **108**(1): 17-29.
- 654
- 655 13. Meyer MB, Benkusky NA, Sen B, Rubin J, Pike JW. Epigenetic Plasticity Drives Adipogenic and  
656 Osteogenic Differentiation of Marrow-derived Mesenchymal Stem Cells. *The Journal of*  
657 *biological chemistry* 2016, **291**(34): 17829-17847.
- 658
- 659 14. Wang L, Niu N, Li L, Shao R, Ouyang H, Zou W. H3K36 trimethylation mediated by SETD2  
660 regulates the fate of bone marrow mesenchymal stem cells. *PLoS biology* 2018, **16**(11):  
661 e2006522.
- 662
- 663 15. Rauch A, Haakonsson AK, Madsen JGS, Larsen M, Forss I, Madsen MR, *et al.* Osteogenesis  
664 depends on commissioning of a network of stem cell transcription factors that act as repressors  
665 of adipogenesis. *Nature genetics* 2019, **51**(4): 716-727.
- 666
- 667 16. Ke Y, Xu Y, Chen X, Feng S, Liu Z, Sun Y, *et al.* 3D Chromatin Structures of Mature Gametes and  
668 Structural Reprogramming during Mammalian Embryogenesis. *Cell* 2017, **170**(2): 367-381 e320.
- 669
- 670 17. Dixon JR, Selvaraj S, Yue F, Kim A, Li Y, Shen Y, *et al.* Topological domains in mammalian  
671 genomes identified by analysis of chromatin interactions. *Nature* 2012, **485**(7398): 376-380.
- 672
- 673 18. Sun JH, Zhou L, Emerson DJ, Phyo SA, Titus KR, Gong W, *et al.* Disease-Associated Short Tandem  
674 Repeats Co-localize with Chromatin Domain Boundaries. *Cell* 2018, **175**(1): 224-238 e215.
- 675
- 676 19. Sexton T, Cavalli G. The role of chromosome domains in shaping the functional genome. *Cell*  
677 2015, **160**(6): 1049-1059.
- 678
- 679 20. Greenwald WW, Chiou J, Yan J, Qiu Y, Dai N, Wang A, *et al.* Pancreatic islet chromatin  
680 accessibility and conformation reveals distal enhancer networks of type 2 diabetes risk. *Nature*  
681 *communications* 2019, **10**(1): 2078.
- 682
- 683 21. Nolis IK, McKay DJ, Mantouvalou E, Lomvardas S, Merika M, Thanos D. Transcription factors  
684 mediate long-range enhancer-promoter interactions. *Proceedings of the National Academy of*  
685 *Sciences of the United States of America* 2009, **106**(48): 20222-20227.
- 686
- 687 22. Jin F, Li Y, Dixon JR, Selvaraj S, Ye Z, Lee AY, *et al.* A high-resolution map of the three-  
688 dimensional chromatin interactome in human cells. *Nature* 2013, **503**(7475): 290-294.
- 689



- 690 23. Greenwald WW, Li H, Benaglio P, Jakubosky D, Matsui H, Schmitt A, *et al.* Subtle changes in  
691 chromatin loop contact propensity are associated with differential gene regulation and  
692 expression. *Nature communications* 2019, **10**(1): 1054.
- 693
- 694 24. Wingett S, Ewels P, Furlan-Magaril M, Nagano T, Schoenfelder S, Fraser P, *et al.* HiCUP: pipeline  
695 for mapping and processing Hi-C data. *F1000Research* 2015, **4**: 1310.
- 696
- 697 25. Lieberman-Aiden E, van Berkum NL, Williams L, Imakaev M, Ragoczy T, Telling A, *et al.*  
698 Comprehensive mapping of long-range interactions reveals folding principles of the human  
699 genome. *Science* 2009, **326**(5950): 289-293.
- 700
- 701 26. Rao SS, Huntley MH, Durand NC, Stamenova EK, Bochkov ID, Robinson JT, *et al.* A 3D map of the  
702 human genome at kilobase resolution reveals principles of chromatin looping. *Cell* 2014, **159**(7):  
703 1665-1680.
- 704
- 705 27. Bult CJ, Blake JA, Smith CL, Kadin JA, Richardson JE, Mouse Genome Database G. Mouse Genome  
706 Database (MGD) 2019. *Nucleic acids research* 2019, **47**(D1): D801-D806.
- 707
- 708 28. Smallwood A, Ren B. Genome organization and long-range regulation of gene expression by  
709 enhancers. *Current opinion in cell biology* 2013, **25**(3): 387-394.
- 710
- 711 29. Siersbaek R, Madsen JGS, Javierre BM, Nielsen R, Bagge EK, Cairns J, *et al.* Dynamic Rewiring of  
712 Promoter-Anchored Chromatin Loops during Adipocyte Differentiation. *Molecular cell* 2017,  
713 **66**(3): 420-435 e425.
- 714
- 715 30. Rubin AJ, Barajas BC, Furlan-Magaril M, Lopez-Pajares V, Mumbach MR, Howard I, *et al.* Lineage-  
716 specific dynamic and pre-established enhancer-promoter contacts cooperate in terminal  
717 differentiation. *Nature genetics* 2017, **49**(10): 1522-1528.
- 718
- 719 31. Nora EP, Lajoie BR, Schulz EG, Giorgetti L, Okamoto I, Servant N, *et al.* Spatial partitioning of the  
720 regulatory landscape of the X-inactivation centre. *Nature* 2012, **485**(7398): 381-385.
- 721
- 722 32. Morris JA, Tsai PC, Joehanes R, Zheng J, Trajanoska K, Soerensen M, *et al.* Epigenome-wide  
723 Association of DNA Methylation in Whole Blood With Bone Mineral Density. *Journal of bone and  
724 mineral research : the official journal of the American Society for Bone and Mineral Research*  
725 2017, **32**(8): 1644-1650.
- 726
- 727 33. Greenblatt MB, Shim JH. Osteoimmunology: a brief introduction. *Immune network* 2013, **13**(4):  
728 111-115.
- 729

- 730 34. Fulzele K, Riddle RC, DiGirolamo DJ, Cao X, Wan C, Chen D, *et al.* Insulin receptor signaling in  
731 osteoblasts regulates postnatal bone acquisition and body composition. *Cell* 2010, **142**(2): 309-  
732 319.
- 733
- 734 35. Ohta H, Itoh N. Roles of FGFs as Adipokines in Adipose Tissue Development, Remodeling, and  
735 Metabolism. *Frontiers in endocrinology* 2014, **5**: 18.
- 736
- 737 36. Ott CJ, Federation AJ, Schwartz LS, Kasar S, Klitgaard JL, Lenci R, *et al.* Enhancer Architecture and  
738 Essential Core Regulatory Circuitry of Chronic Lymphocytic Leukemia. *Cancer cell* 2018, **34**(6):  
739 982-995 e987.
- 740
- 741 37. Consortium EP. An integrated encyclopedia of DNA elements in the human genome. *Nature*  
742 2012, **489**(7414): 57-74.
- 743
- 744 38. Cadoudal T, Distel E, Durant S, Fouque F, Blouin JM, Collinet M, *et al.* Pyruvate dehydrogenase  
745 kinase 4: regulation by thiazolidinediones and implication in glyceroneogenesis in adipose tissue.  
746 *Diabetes* 2008, **57**(9): 2272-2279.
- 747
- 748 39. Miki H, Yamauchi T, Suzuki R, Komeda K, Tsuchida A, Kubota N, *et al.* Essential role of insulin  
749 receptor substrate 1 (IRS-1) and IRS-2 in adipocyte differentiation. *Molecular and cellular biology*  
750 2001, **21**(7): 2521-2532.
- 751
- 752 40. Wang P, Keijer J, Bunschoten A, Bouwman F, Renes J, Mariman E. Insulin modulates the  
753 secretion of proteins from mature 3T3-L1 adipocytes: a role for transcriptional regulation of  
754 processing. *Diabetologia* 2006, **49**(10): 2453-2462.
- 755
- 756 41. Attane C, Esteve D, Chaoui K, Iacovoni JS, Corre J, Moutahir M, *et al.* Human Bone Marrow Is  
757 Comprised of Adipocytes with Specific Lipid Metabolism. *Cell reports* 2020, **30**(4): 949-958 e946.
- 758
- 759 42. Komori T. Molecular Mechanism of Runx2-Dependent Bone Development. *Molecules and cells*  
760 2020.
- 761
- 762 43. Hiruma Y, Tsuda E, Maeda N, Okada A, Kabasawa N, Miyamoto M, *et al.* Impaired osteoclast  
763 differentiation and function and mild osteopetrosis development in Siglec-15-deficient mice.  
764 *Bone* 2013, **53**(1): 87-93.
- 765
- 766 44. Pei YF, Liu L, Liu TL, Yang XL, Zhang H, Wei XT, *et al.* Joint Association Analysis Identified 18 New  
767 Loci for Bone Mineral Density. *Journal of bone and mineral research : the official journal of the*  
768 *American Society for Bone and Mineral Research* 2019, **34**(6): 1086-1094.
- 769

- 770 45. Yevshin I, Sharipov R, Kolmykov S, Kondrakhin Y, Kolpakov F. GTRD: a database on gene  
771 transcription regulation-2019 update. *Nucleic acids research* 2019, **47**(D1): D100-D105.
- 772
- 773 46. Khalid AB, Krum SA. Estrogen receptors alpha and beta in bone. *Bone* 2016, **87**: 130-135.
- 774
- 775 47. Watters RJ, Hartmaier RJ, Osmanbeyoglu HU, Gillihan RM, Rae JM, Liao L, *et al.* Steroid receptor  
776 coactivator-1 can regulate osteoblastogenesis independently of estrogen. *Molecular and cellular*  
777 *endocrinology* 2017, **448**: 21-27.
- 778
- 779 48. Schneider CA, Rasband WS, Eliceiri KW. NIH Image to ImageJ: 25 years of image analysis. *Nature*  
780 *methods* 2012, **9**(7): 671-675.
- 781
- 782 49. Gayral P, Weinert L, Chiari Y, Tsagkogeorga G, Ballenghien M, Galtier N. Next-generation  
783 sequencing of transcriptomes: a guide to RNA isolation in nonmodel animals. *Molecular ecology*  
784 *resources* 2011, **11**(4): 650-661.
- 785
- 786 50. Chen XF, Zhu DL, Yang M, Hu WX, Duan YY, Lu BJ, *et al.* An Osteoporosis Risk SNP at 1p36.12  
787 Acts as an Allele-Specific Enhancer to Modulate LINC00339 Expression via Long-Range Loop  
788 Formation. *American journal of human genetics* 2018, **102**(5): 776-793.
- 789
- 790 51. Buenrostro JD, Giresi PG, Zaba LC, Chang HY, Greenleaf WJ. Transposition of native chromatin  
791 for fast and sensitive epigenomic profiling of open chromatin, DNA-binding proteins and  
792 nucleosome position. *Nature methods* 2013, **10**(12): 1213-1218.
- 793
- 794 52. Imakaev M, Fudenberg G, McCord RP, Naumova N, Goloborodko A, Lajoie BR, *et al.* Iterative  
795 correction of Hi-C data reveals hallmarks of chromosome organization. *Nature methods* 2012,  
796 **9**(10): 999-1003.
- 797
- 798 53. Heinz S, Benner C, Spann N, Bertolino E, Lin YC, Laslo P, *et al.* Simple combinations of lineage-  
799 determining transcription factors prime cis-regulatory elements required for macrophage and B  
800 cell identities. *Molecular cell* 2010, **38**(4): 576-589.
- 801
- 802 54. Robinson MD, McCarthy DJ, Smyth GK. edgeR: a Bioconductor package for differential  
803 expression analysis of digital gene expression data. *Bioinformatics* 2010, **26**(1): 139-140.
- 804
- 805 55. Fang H, Knezevic B, Burnham KL, Knight JC. XGR software for enhanced interpretation of  
806 genomic summary data, illustrated by application to immunological traits. *Genome medicine*  
807 2016, **8**(1): 129.
- 808
- 809 56. Dobin A, Davis CA, Schlesinger F, Drenkow J, Zaleski C, Jha S, *et al.* STAR: ultrafast universal RNA-  
810 seq aligner. *Bioinformatics* 2013, **29**(1): 15-21.

- 811  
812 57. DePristo MA, Banks E, Poplin R, Garimella KV, Maguire JR, Hartl C, *et al.* A framework for  
813 variation discovery and genotyping using next-generation DNA sequencing data. *Nature genetics*  
814 2011, **43**(5): 491-498.
- 815  
816 58. Li B, Dewey CN. RSEM: accurate transcript quantification from RNA-Seq data with or without a  
817 reference genome. *BMC bioinformatics* 2011, **12**: 323.
- 818  
819 59. Ritchie ME, Phipson B, Wu D, Hu Y, Law CW, Shi W, *et al.* limma powers differential expression  
820 analyses for RNA-sequencing and microarray studies. *Nucleic acids research* 2015, **43**(7): e47.
- 821  
822 60. Langmead B, Salzberg SL. Fast gapped-read alignment with Bowtie 2. *Nature methods* 2012, **9**(4):  
823 357-359.
- 824  
825 61. Zhang Y, Liu T, Meyer CA, Eeckhoute J, Johnson DS, Bernstein BE, *et al.* Model-based analysis of  
826 ChIP-Seq (MACS). *Genome biology* 2008, **9**(9): R137.
- 827  
828 62. Quinlan AR, Hall IM. BEDTools: a flexible suite of utilities for comparing genomic features.  
829 *Bioinformatics* 2010, **26**(6): 841-842.
- 830  
831 63. Ramirez F, Ryan DP, Gruning B, Bhardwaj V, Kilpert F, Richter AS, *et al.* deepTools2: a next  
832 generation web server for deep-sequencing data analysis. *Nucleic acids research* 2016, **44**(W1):  
833 W160-165.
- 834  
835 64. Consortium GT. Human genomics. The Genotype-Tissue Expression (GTEx) pilot analysis:  
836 multitissue gene regulation in humans. *Science* 2015, **348**(6235): 648-660.
- 837  
838  
839

840 **Acknowledgements**

841 This work was supported by grants from the National Natural Science Foundation of China (31871264,  
842 31970569), the Natural Science Basic Research Program Shaanxi Province (2019JM-119) and the  
843 Fundamental Research Funds for the Central Universities. We would like to thank the GTEx Consortium.  
844 We obtained GTEx data through dbGaP authorized access at  
845 <https://dbgap.ncbi.nlm.nih.gov/aa/wga.cgi?page=login> with the accession number of phs000424.v8.p2.

846

847 **Author contributions**

848 T.L.Y. and Y.G. conceived and supervised this project. R.H.H. conducted the computational work. J.G.  
849 and R.H.H. performed the cell culture experiments. Y.R. performed visualization. S.S.D. built the  
850 pipeline for Hi-C data analysis. H.C. and D.L.Z. carried out the library construction experiments. Y.X.C.  
851 participated in data analysis. R.H.H. wrote the manuscript with the assistance of other authors.

852

853 **Conflict of Interest**

854 All the authors declare that they have no conflicts of interest.

855

856 **Figure legends**

857 Fig. 1. Chromatin conformation features of hMSC and differentiated adipocytes and osteoblasts.

858 **a** hMSCs were differentiated into adipocytes and osteoblasts by supplying with specific differentiation  
859 media. The collections of cells were subjected to Hi-C, RNA-seq, ChIP-seq and ATAC-seq measurement.

860 **b** Normalized Hi-C contact heatmap at 50 kb, 10 kb and 2 kb/1 kb resolutions for different cells. An  
861 expected cell-specific interaction was circled, which also shows cell-lineage specificity.

862 **c** The correlation of TAD signals between hMSC and differentiated adipocytes (AC) and osteoblasts (OB)  
863 cells, respectively. *P* values and correlation coefficients were estimated by Pearson correlation test.

864 **d** Number of shared and cell-specific loops identified in 3 cells.

865 Fig. 2. Chromatin loop anchors and interaction fragments are enriched with active regulation elements.

866 **a** Regulatory elements annotation at loop anchors and interacting fragments. The relative fraction was  
867 compared with genomic background for enrichment analysis. Permutation test was executed to estimate  
868 enrichment significance. All comparisons have reached statistical significance ( $P < 0.05$ ).

869 **b** Region enrichment results illustrating the ChromHMM annotation enrichment at loop anchors and their  
870 2 kb interval regions. Enrichment Z-scores are plotted. Cells are separated by different shapes, and  
871 regions are distinguished by different colors.

872 **c** Bar plot showing the fold change of CTCF binding sites enrichment at loop anchors and their 2 kb  
873 interval regions. Statistical significance was calculated with treating 2 kb interval regions as background.  
874  $P < 0.05$  is asterisked.

875 **d** Histograms showing the distribution density of genomic distance of identified loops and chromatin  
876 interactions.

877 **e** Fraction of stable loops and interactions. Both loop anchors and anchor pairs, interacting fragments and  
878 interaction pairs in AC and OB were compared with that in hMSC. Stable interactions and loops in hMSC  
879 were counted if they are overlapped in either AC or OB.

880 Fig. 3. Chromatin 3D structure is coupled with active gene expression, and differentially contact loops are  
881 close related to gene activities after adipogenic and osteogenic differentiation.

882 **a** General gene expression level with respect to different distances to interacting fragments.

883 **b** (Left panel) Heatmap showing the Gene expression TPM of up-regulated genes in AC and OB. (Right  
884 panel) Differentiation associated GO pathway enrichment using up-regulated genes located within  
885 different distances to DC elevated loop anchors

886 **c** Pie charts showing the fraction of up-regulated genes located in or outside of TADs.

887 **d** Comparison of gene expression levels in AC/OB and hMSC with respect to mapping DC loop counts. *P*  
888 values were calculated by paired-sample t-test.

889 **e** Up-regulated gene distribution along  $\pm 1$  Mb flanking regions of AC/OB loop anchors and randomly  
890 selected genomic regions that match the length and GC content of loop anchors. RNA-seq signals were  
891 RPKM normalized.

892 **f** The Jaccard similarity coefficients indicate the gene set similarity between AC and OB with genes  
893 mapping to either unique or shared loops under different genomic distance to loop anchors.

894 **g** An illustration of differential contact loops near *APOE* with enhanced contact frequency (heatmap, left)  
895 and increased pairwise interactions (arc, right) in AC cells comparing with hMSC and OB, which is  
896 accompanied by elevated *APOE* expression level (middle). The arrow heads indicate the loop interacting  
897 position.

898 Fig. 4. Adipogenesis and osteogenesis are achieved by strengthened loops featured with cell-specific  
899 enhancers.

900 **a** Heatmap of Pearson correlation coefficients for H3K27ac and H3K4me1 ChIP-seq signals.

901 **b** Violin plot showing the contact frequency difference between loops with and without enhancer  
902 mapping. Statistical significance was calculated by t-test.

903 **c** Comparison of H3K27ac and H3K4me1 distribution at cell-specific loop enhancers (CSLE) among 3  
904 cells. ChIP-seq signals are normalized for reads count and length.

905 **d** Enhancer enrichment at DC loops. Fisher exact test was used to determine enrichment status, and  
906 enrichment direction was defined by odds ratio.

907 **e** Diagram showing 4 proposed transcriptional regulation patterns (left panel), and the pathway  
908 enrichment with unique expressed genes in each pattern (right panel). GO pathways related to  
909 adipogenesis or osteogenesis are coded by different colors.

910 **f** Venn diagrams showing the gene overlapping between different patterns.

911 Fig. 5. Chromatin accessibility reveals loop-mediated transcription network reprogramming after hMSC  
912 differentiation.

913 **a** Colocalization of chromatin accessible and H3K27ac modification regions. The colocalization was  
914 compared between ATAC-seq peaks (left column) and randomly selected regions with length and GC  
915 content matched regions (right column).

916 **b** Comparison of normalized contact frequency (top) and expression level of promoter mapping  
917 transcripts (bottom) between ATAC-seq peaks and randomly matched regions. Statistical significance  
918 was estimated by t-test.

919 **c** Heatmap showing the enrichment Z-scores of 413 known motifs at chromatin accessible regions in each  
920 cell type. Known regulatory TFs are listed on the right with separating adipogenesis and osteogenesis  
921 related TFs by different colors.

922 **d** Chromatin structure enrichment of ATAC-seq peaks mapping with cell-regulatory motifs. Fisher exact  
923 test was used to determine enrichment status, enrichment direction was defined by odds ratio. Red dashed  
924 line indicates significant threshold  $P = 0.05$ .

925 **e** Violin plot indicating the difference of normalized Hi-C contact frequency at cell-regulatory motifs  
926 between hMSC and differentiated cells. Statistical significance was estimated by t-test.

927 **f** Heatmaps of subtractive interaction matrix and genome browser screenshots showing the unique loop  
928 structure and differential enhancer and open chromatin signals for *IRS2* and *RUNX2*.

929 Fig. 6. Regulatory networks identify loop-mediated gene regulation cascades for cell fate determination.

930 **a** The network construction strategy illustrating the mechanism of gene activation to achieve cell-type  
931 commitment through the spatial proximity of long-range promoter and unique enhancer facilitating by  
932 unique loops.

933 **b** Regulatory networks targeting unique expressed genes in AC and OB. Adipogenesis and osteogenesis  
934 related TFs shown names aside are marked in orange.

935 **c** Representative networks for adipogenesis related gene *IRS2* and osteogenesis related gene *RUNX2*.

936 **d** Genome browser screenshots showing the unique loop structure and cell-specific gene expression for  
937 adipogenesis related gene *IRS2* and osteogenesis related gene *RUNX2*. The ChIP-seq data of putative TF  
938 CTCF ESR1 were added to show the expected binding sites around loop anchors.

939 Fig. 7. eQTL variants are linked to target genes through chromatin loop structures.

940 **a** Q-Q plots drawn with eQTL data from subcutaneous adipose (left panel) and whole blood (right panel)  
941 tissues illustrating the significant enrichment of eQTL associations at AC/OB loops.

942 **b** The regulation cascades identified for *IRS2* and *RUNX2* through jointly analyzing multi-omics data.  
943 eQTL snps were marked in yellow-green, and the putative TFs were marked in lavender.



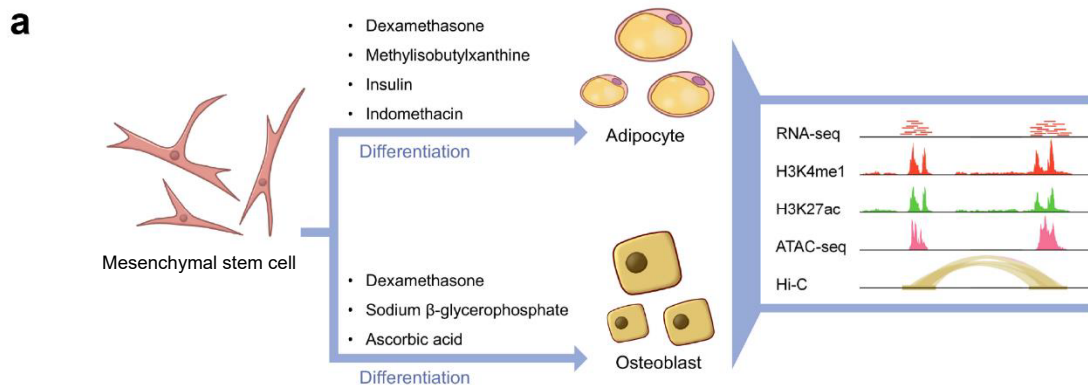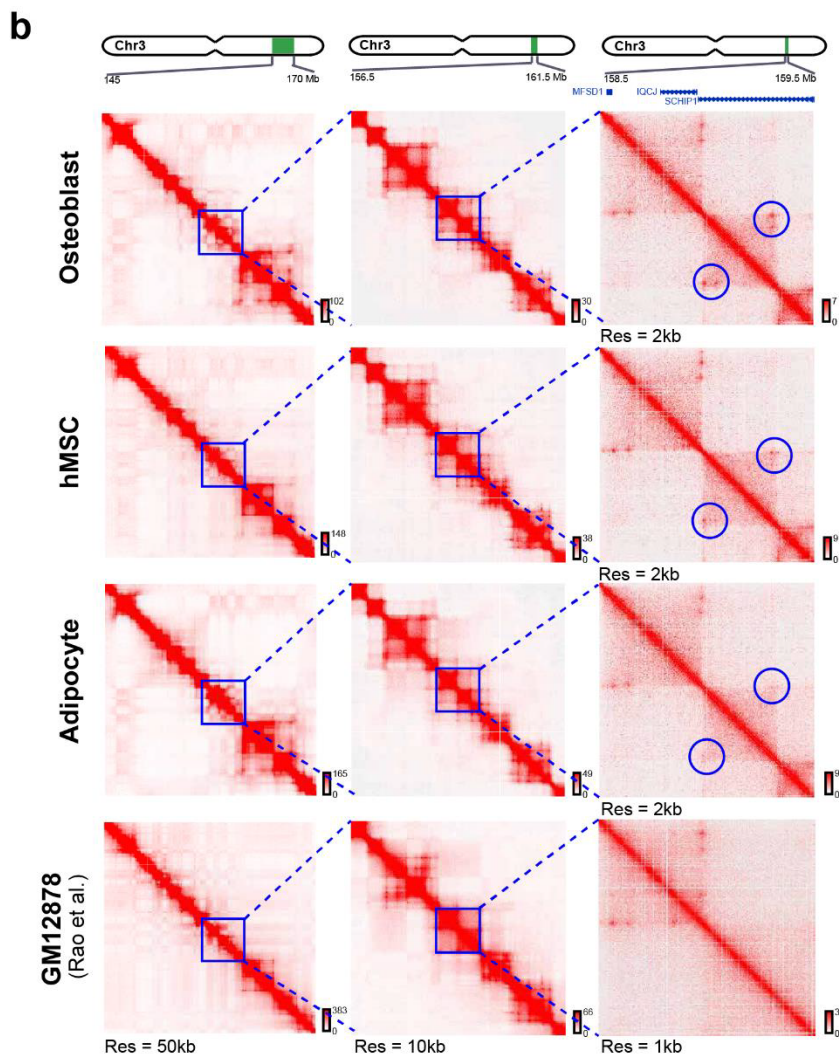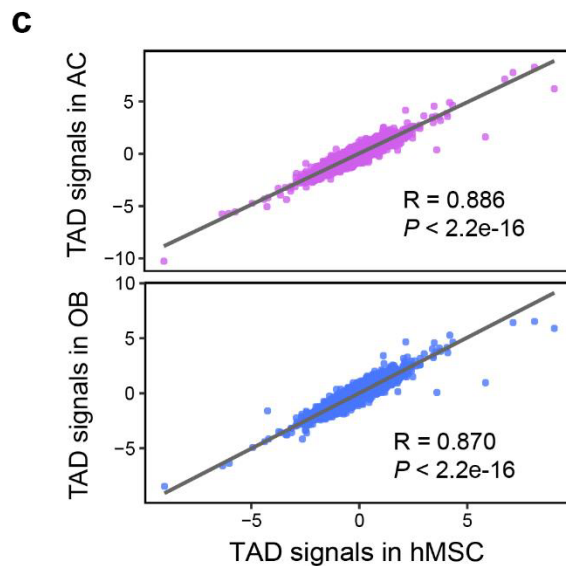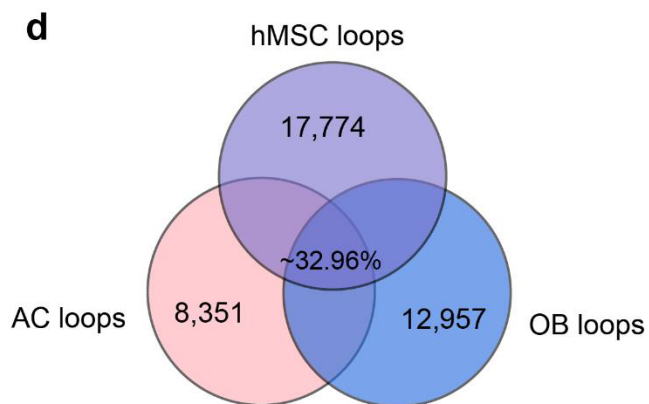

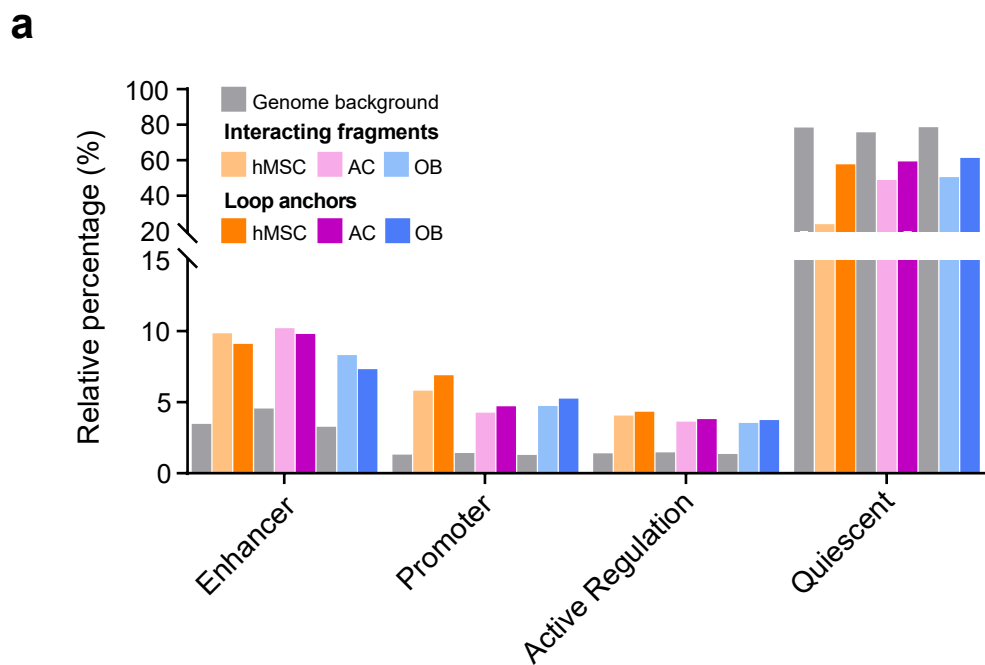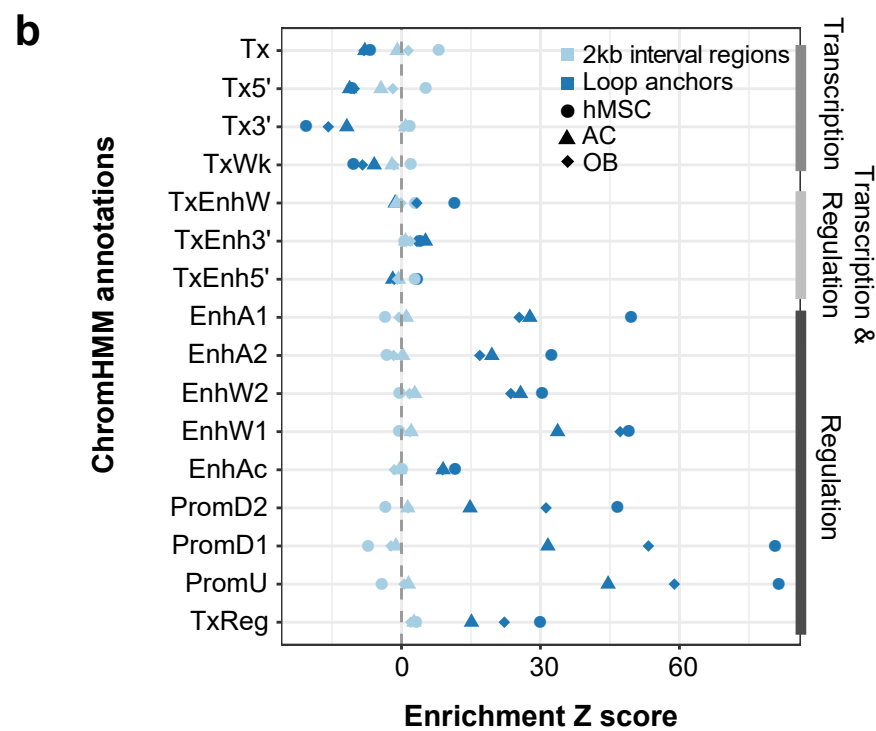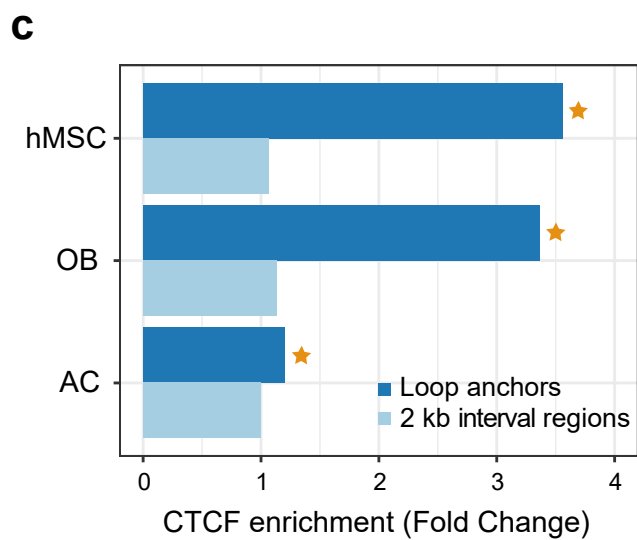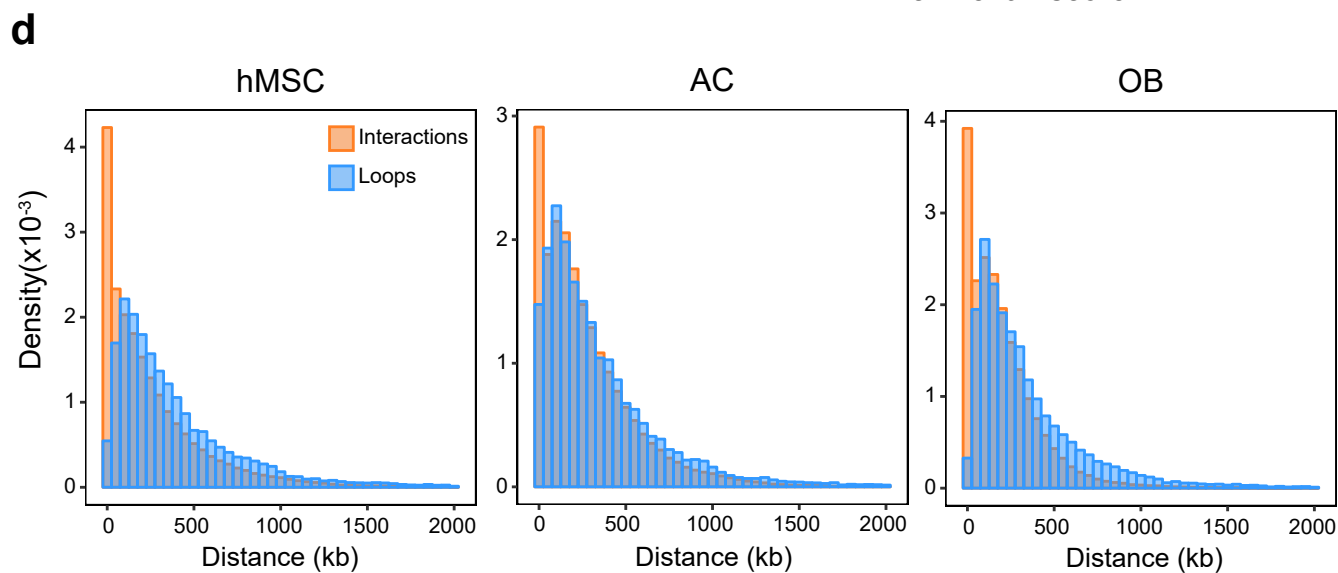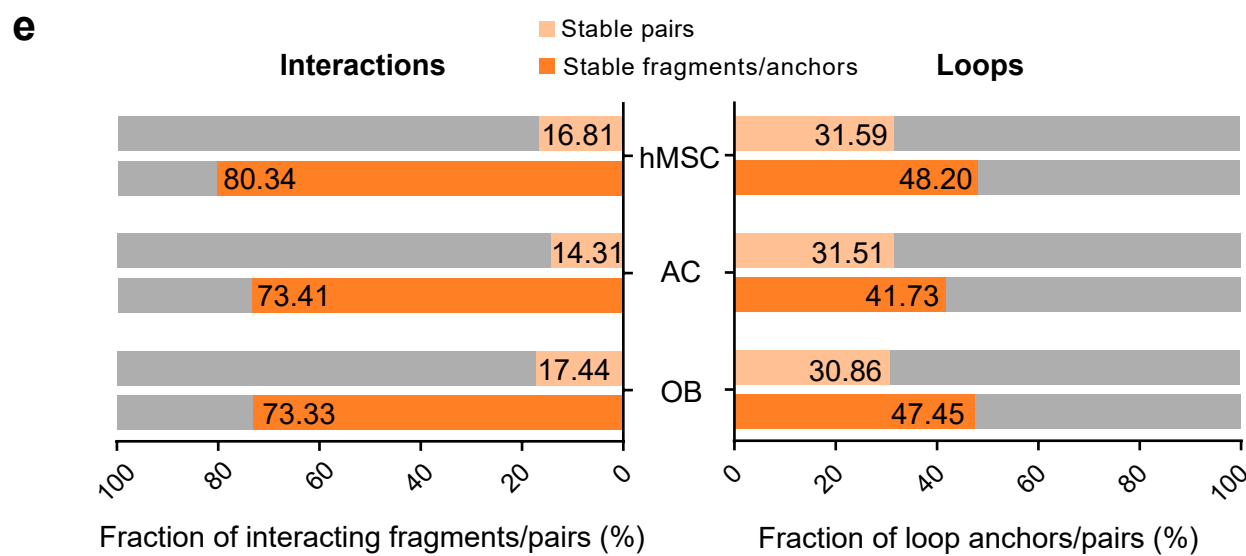

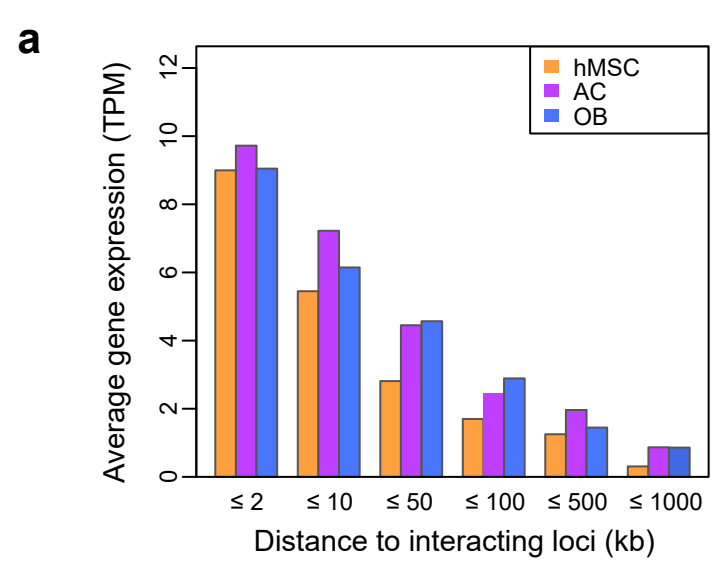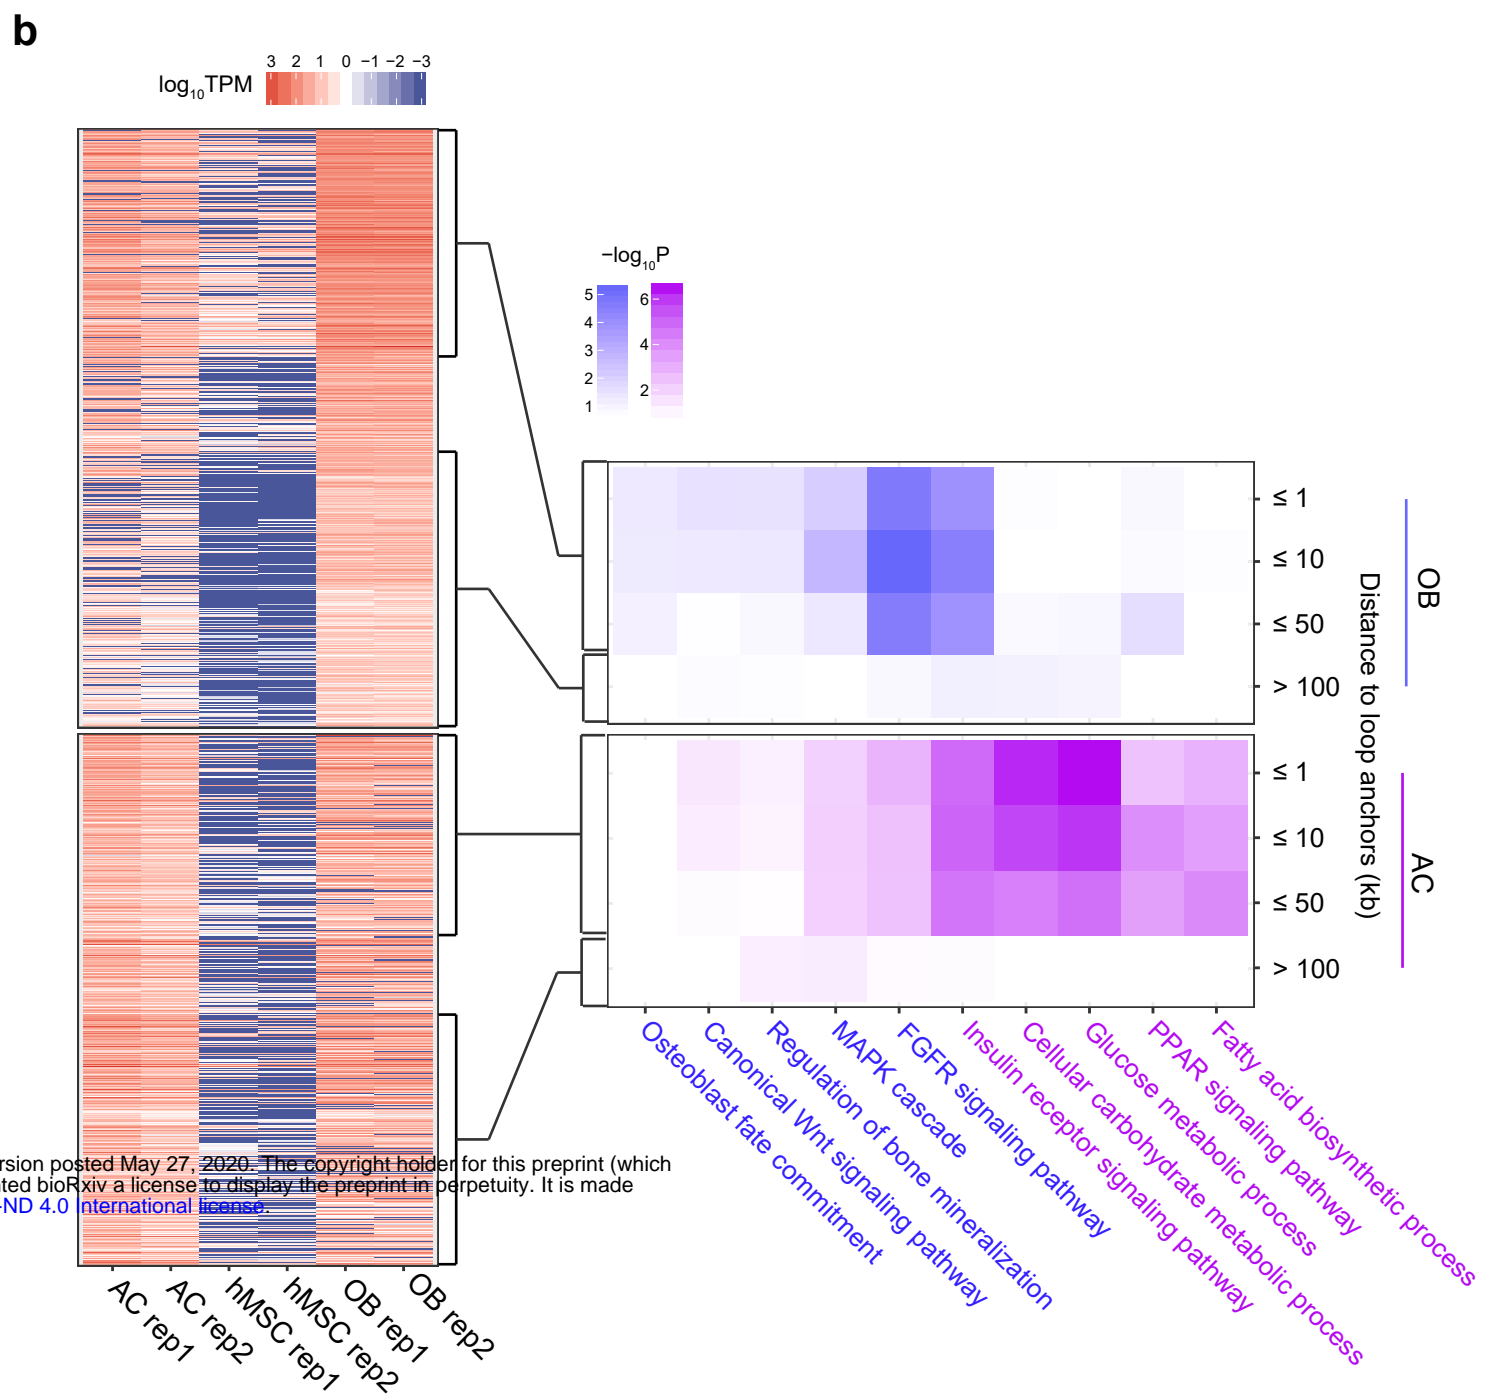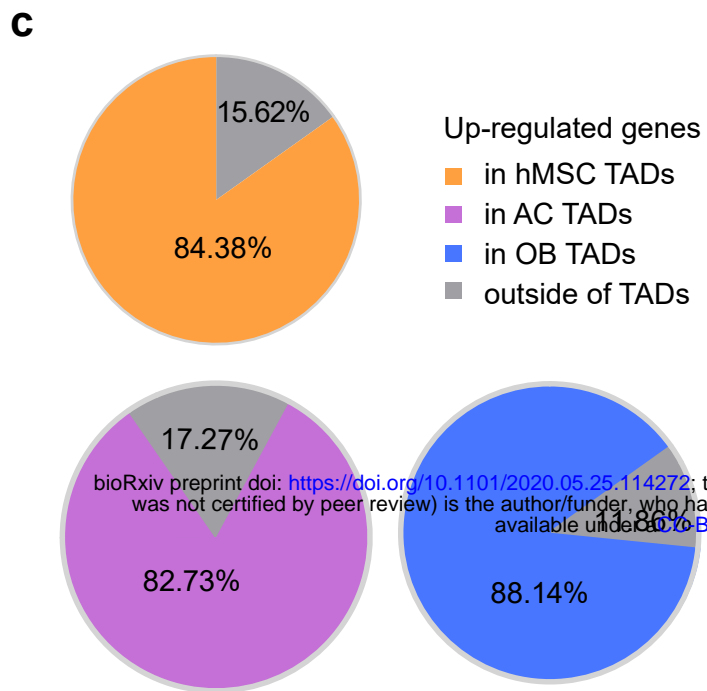

bioRxiv preprint doi: <https://doi.org/10.1101/2020.05.25.114272>; this version posted May 27, 2020. The copyright holder for this preprint (which was not certified by peer review) is the author/funder, who has granted bioRxiv a license to display the preprint in perpetuity. It is made available under aCC-BY-NC-ND 4.0 International license.

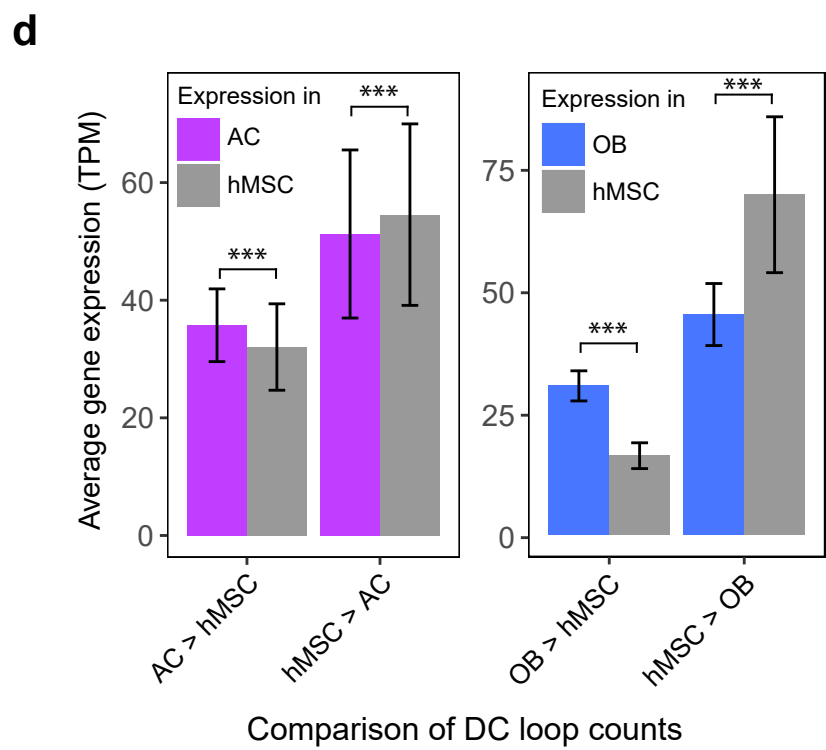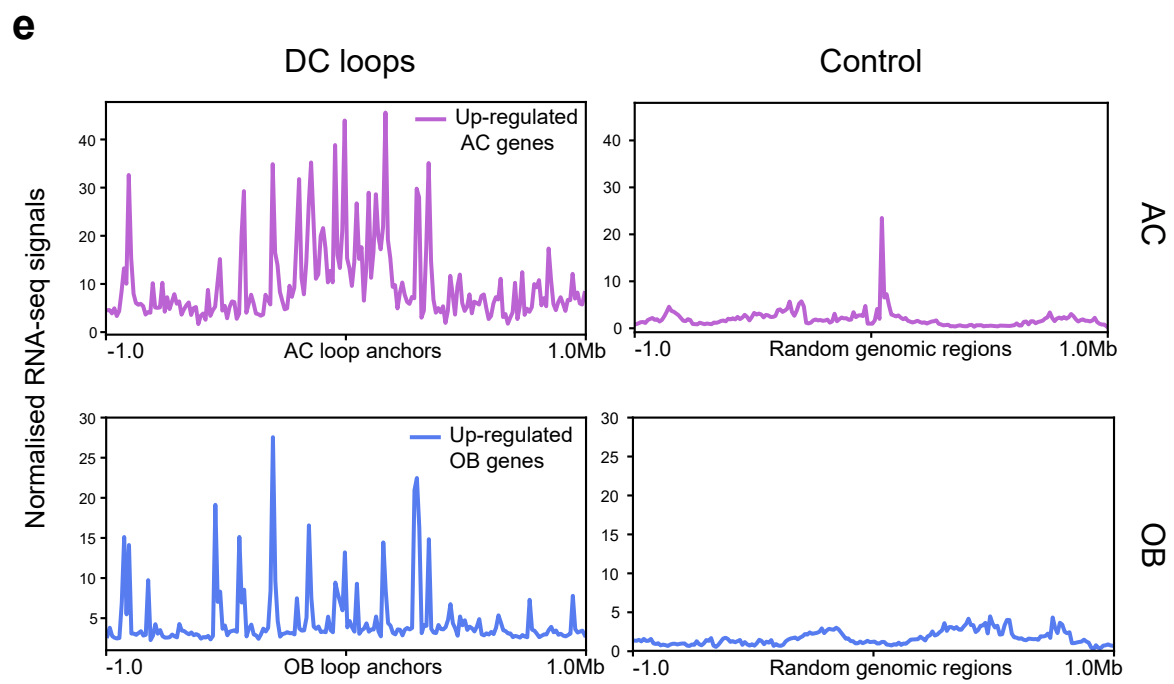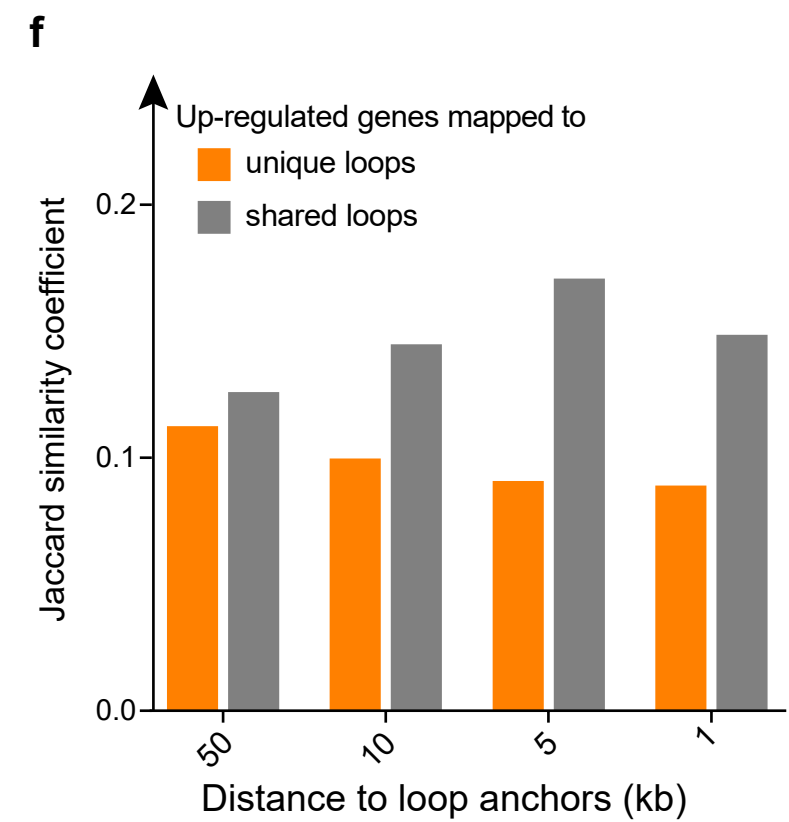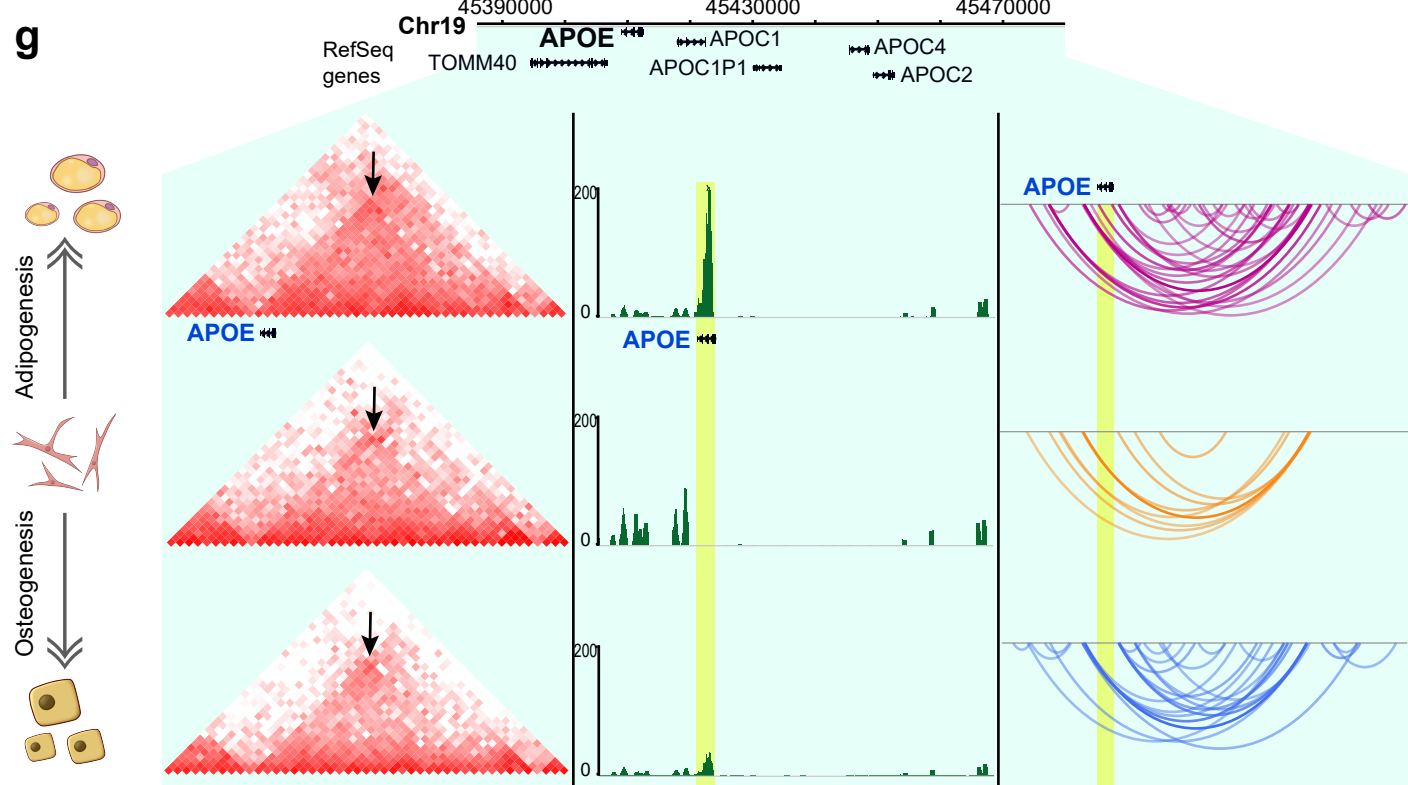

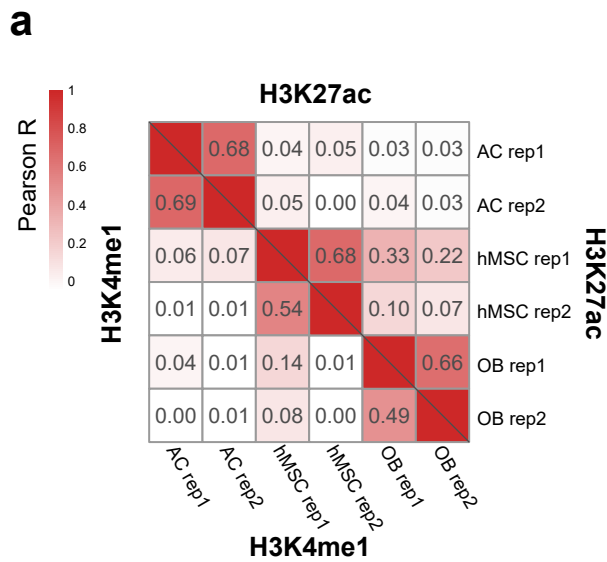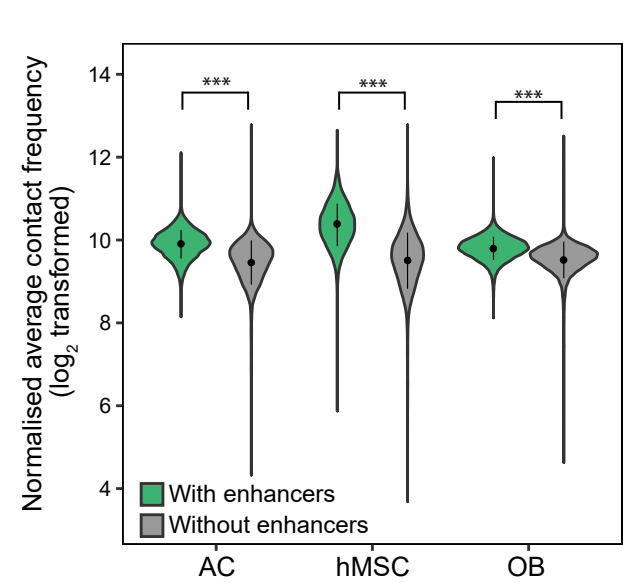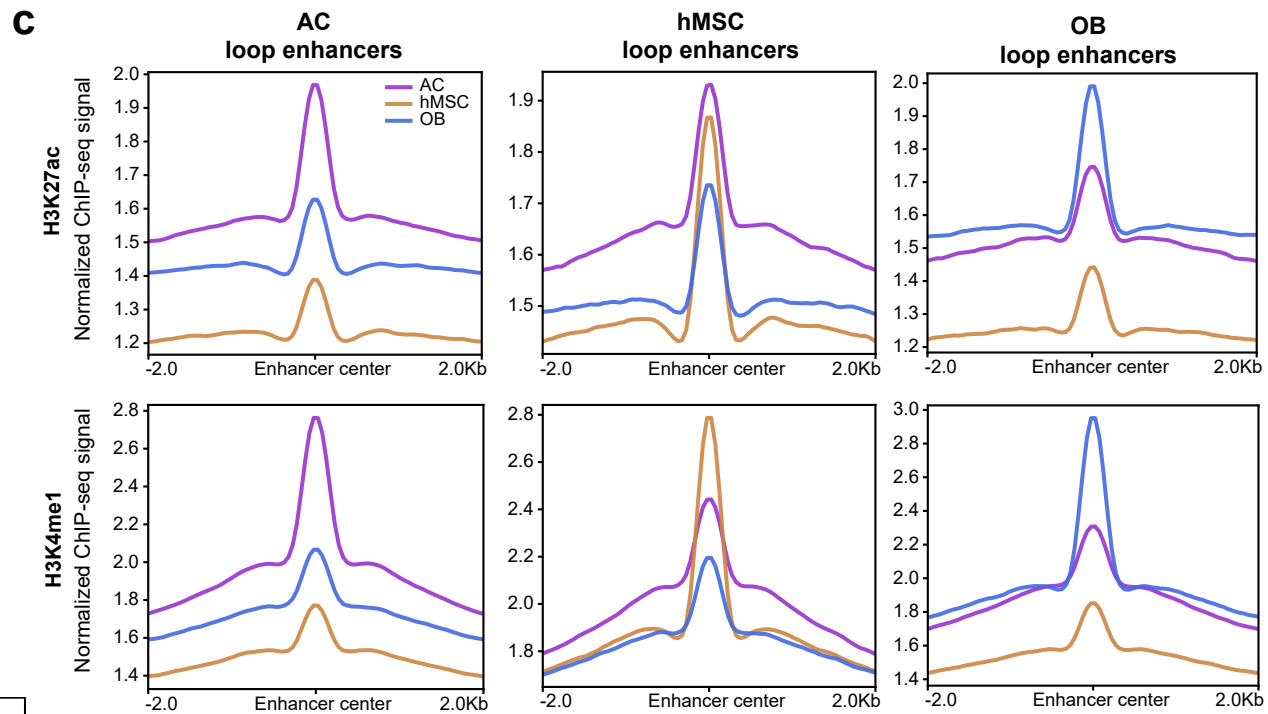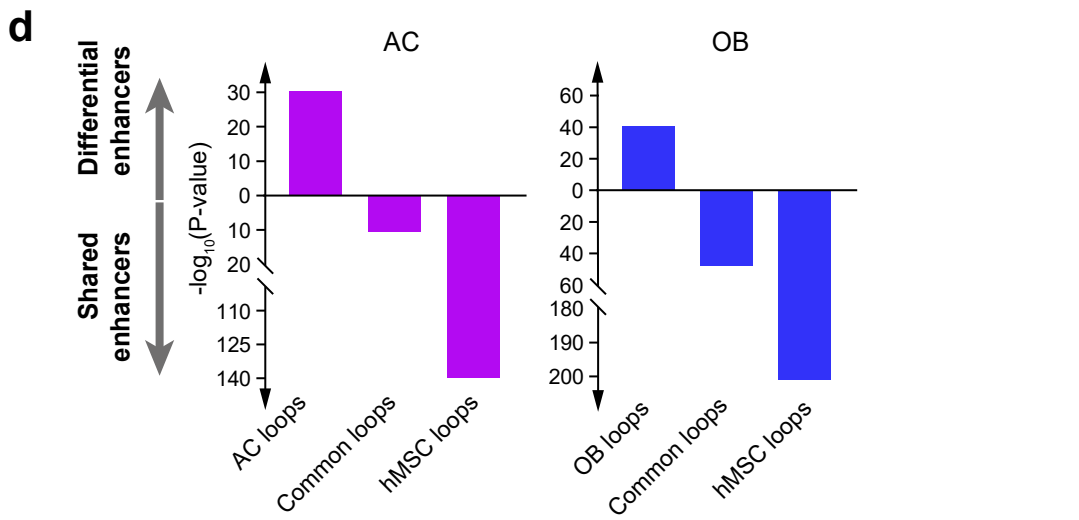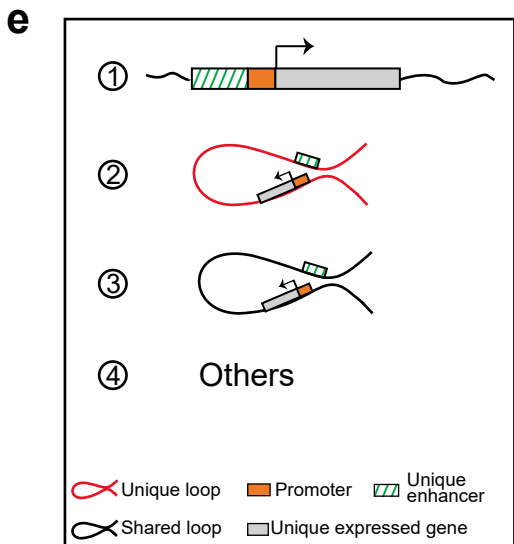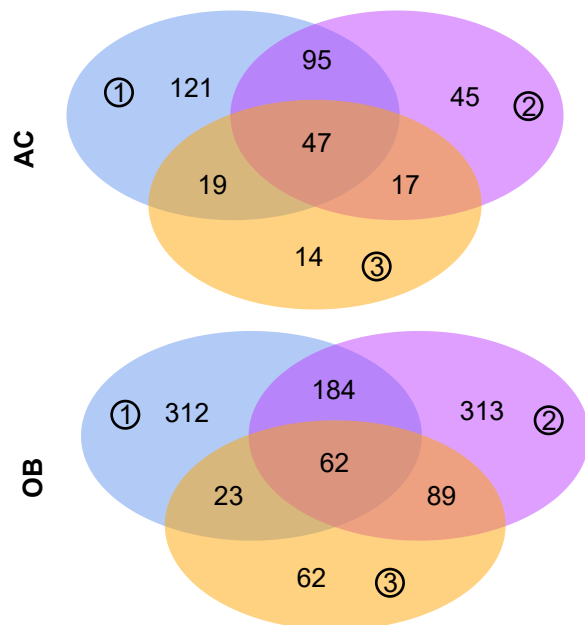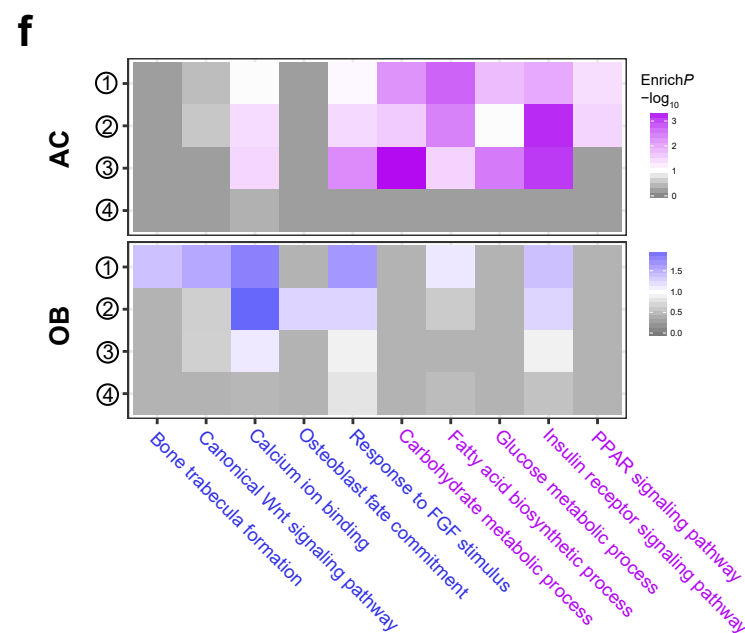



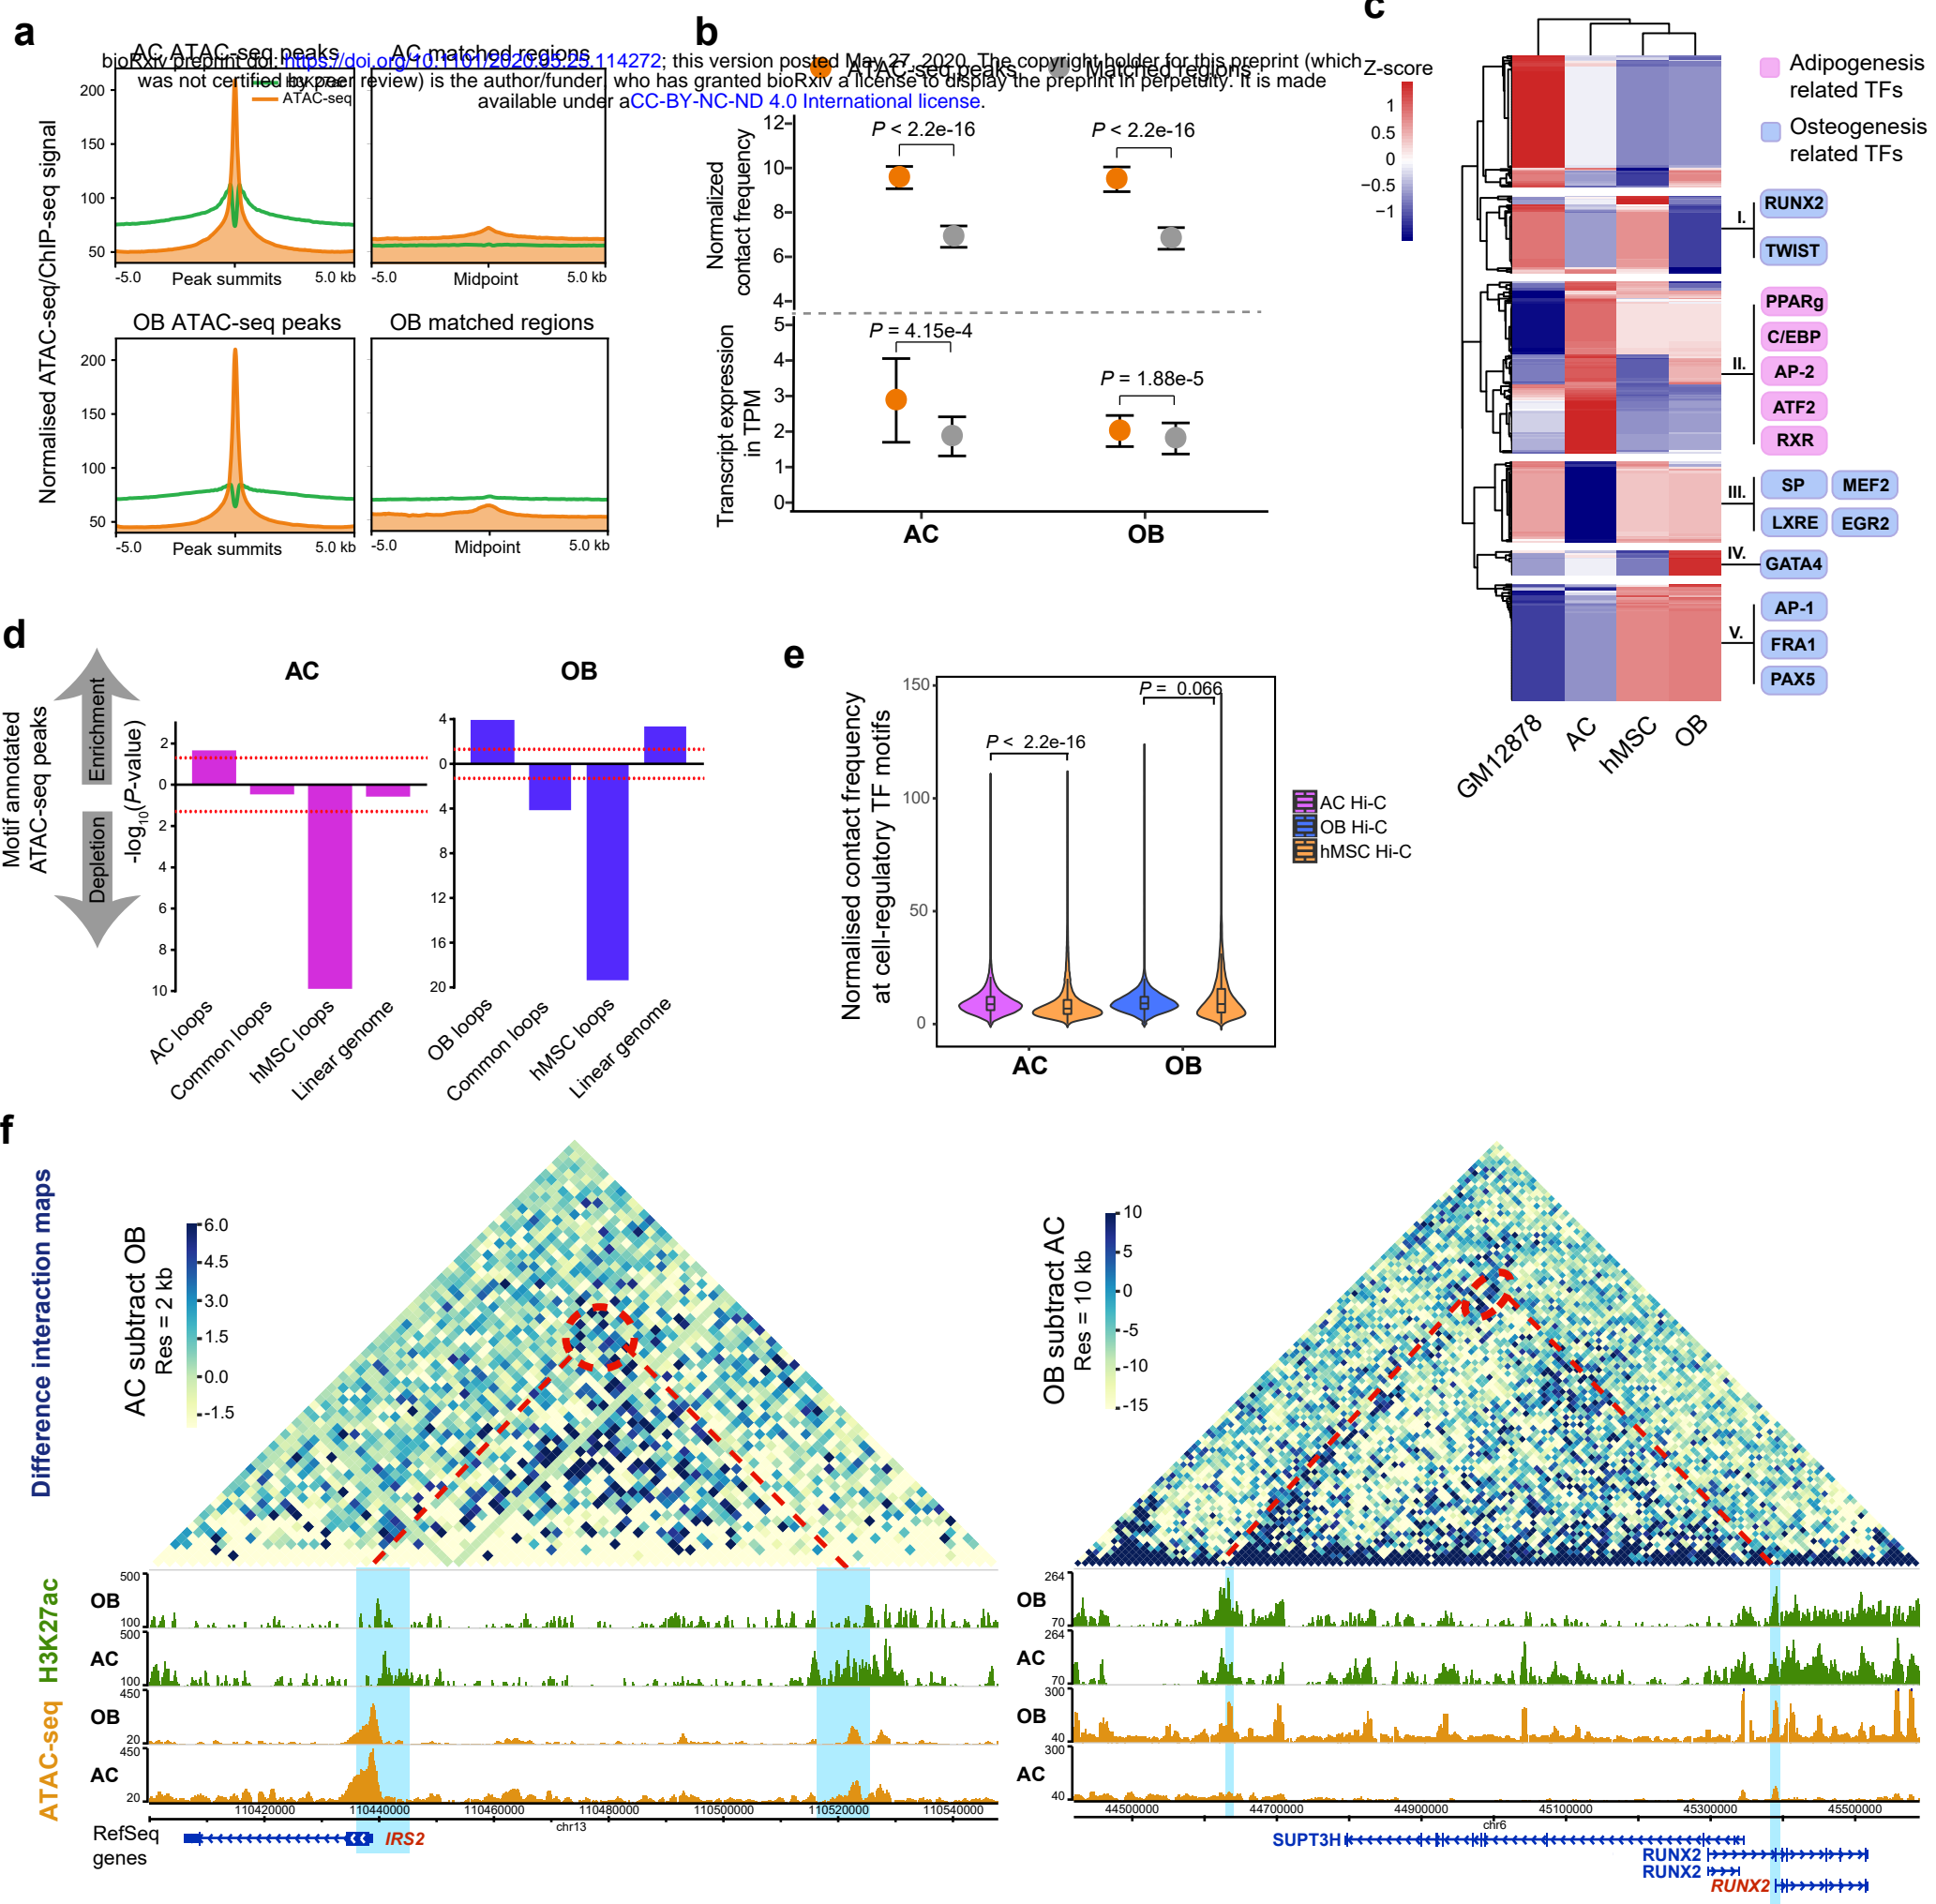

**a**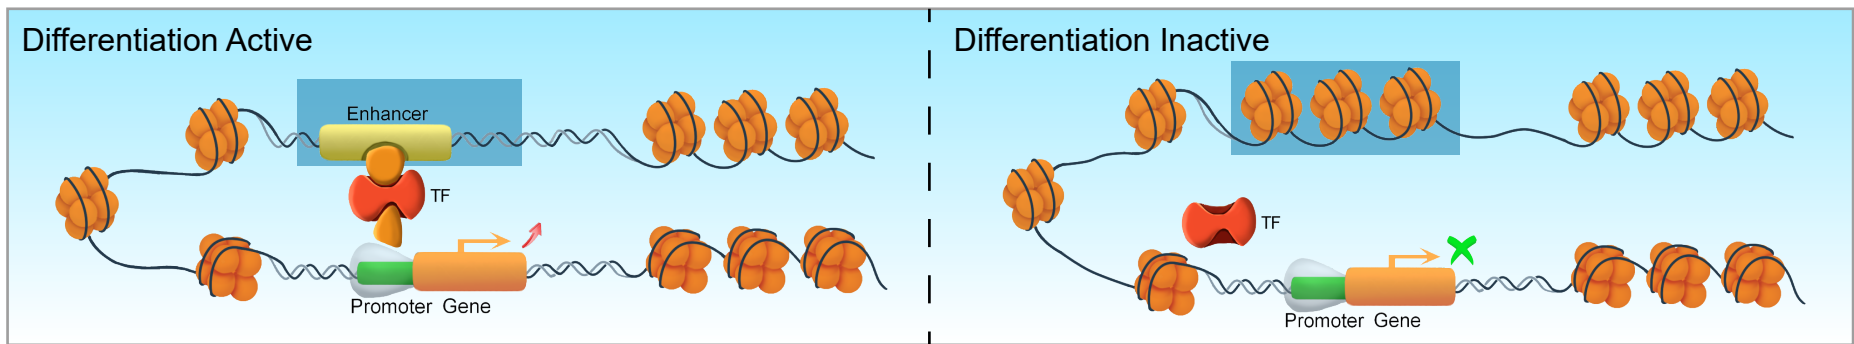**b**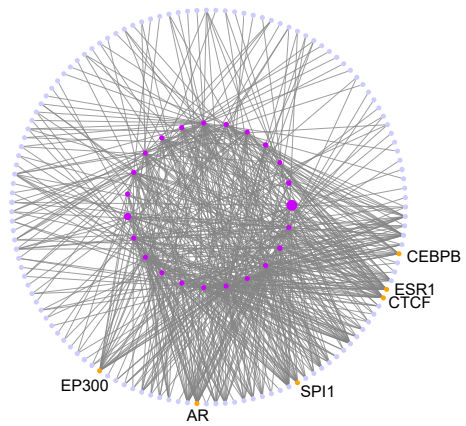

- Uniquely expressed genes in AC
- Uniquely expressed genes in OB
- TFs
- Differentiation related TFs

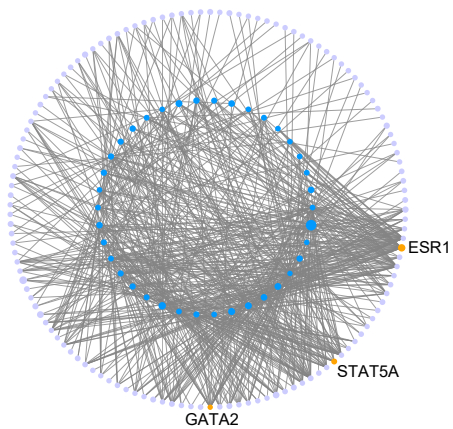**c**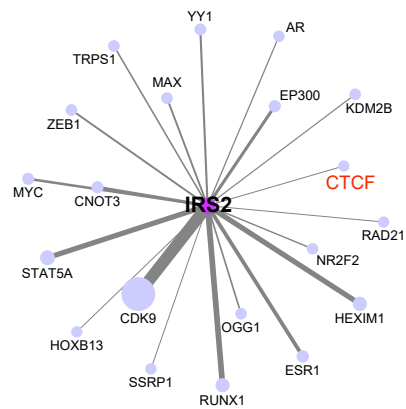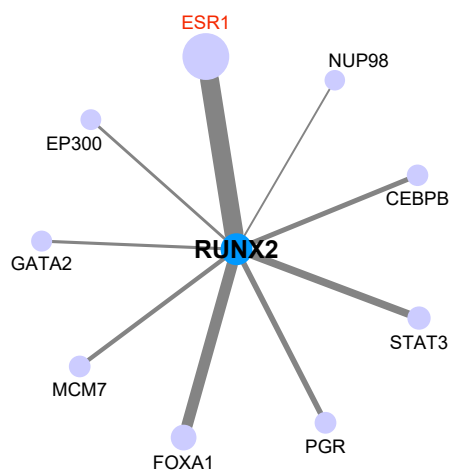**d**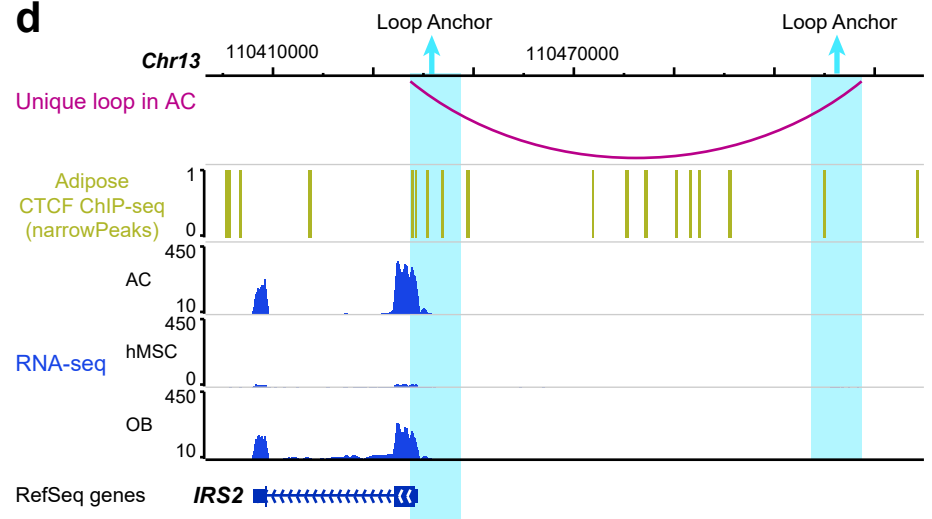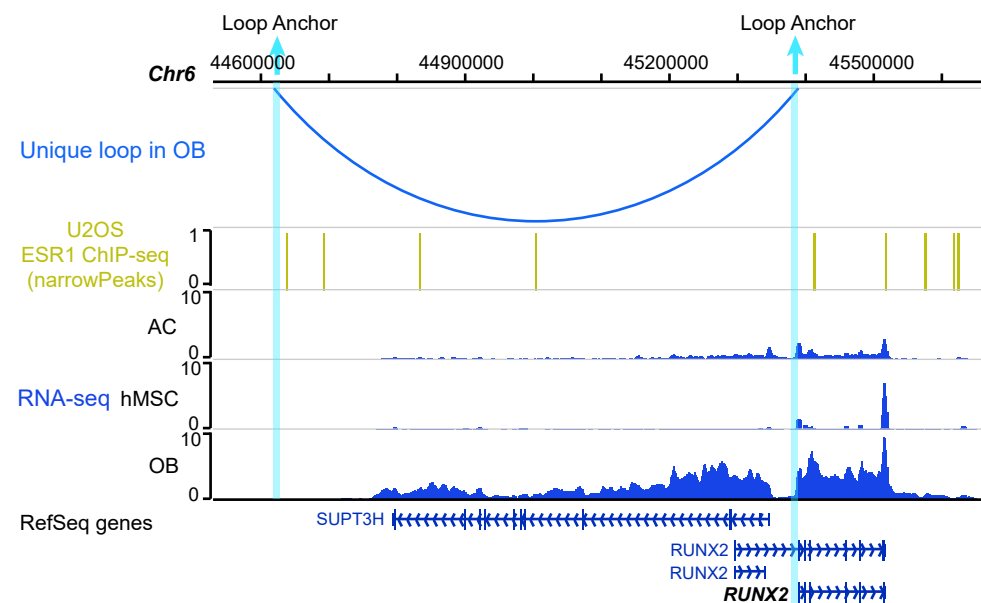

**a**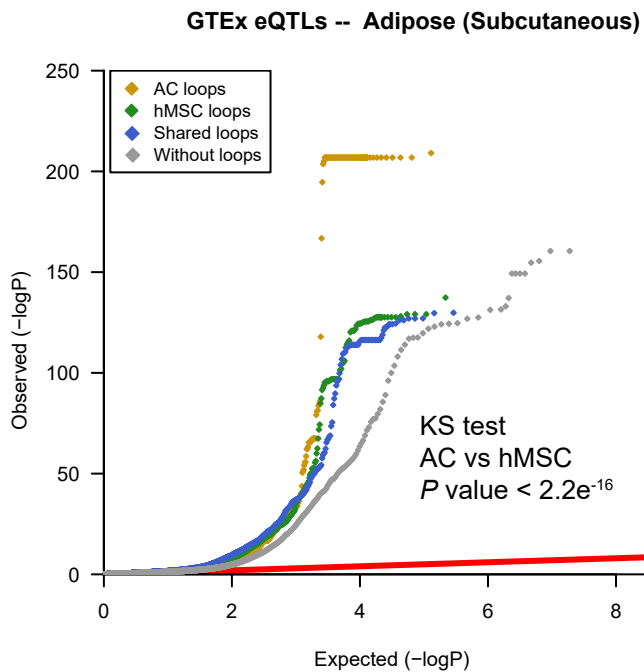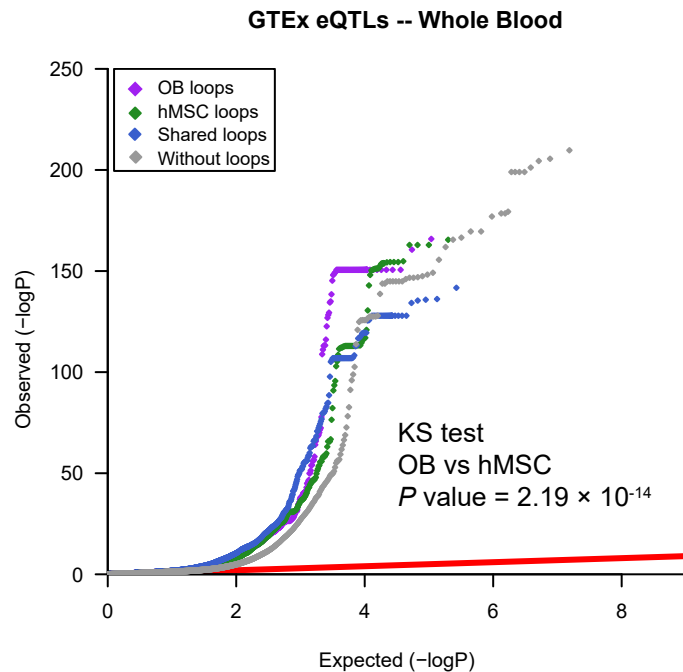**b**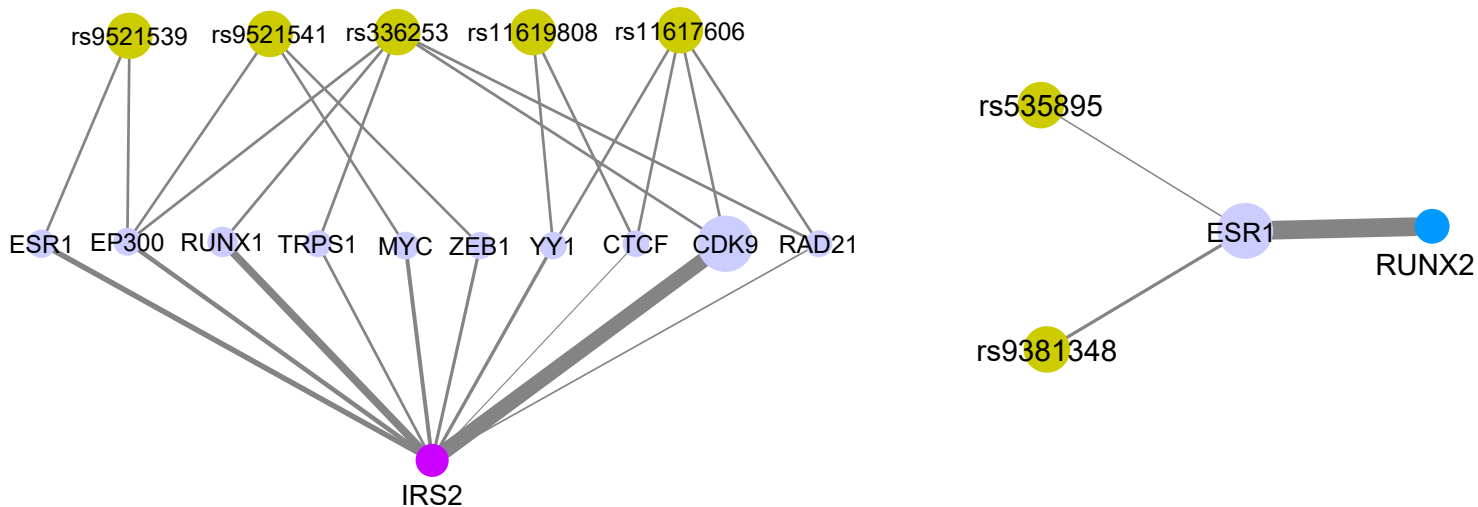

Source: https://www.biorxiv.org/content/10.1101/2020.05.25.114272v1.full.pdf
